1 Bet-hedging antimicrobial strategies in macrophage phagosome acidification drive the dynamics of  
2 *Cryptococcus neoformans* intracellular escape mechanisms

3

4 Quigly Dragotakes<sup>1</sup>, Ella Jacobs<sup>1</sup>, Lia Sanchez Ramirez<sup>2</sup>, Insun Yoon<sup>2</sup>, Caitlin Perez-Stable<sup>2</sup>, Hope Eden<sup>3</sup>,  
5 Jenlu Pagnotta<sup>2</sup>, Raghav Vij<sup>4</sup>, Aviv Bergman<sup>5,6</sup>, Franco D'Alessio<sup>7</sup>, Arturo Casadevall<sup>1\*</sup>

6

7 \*Corresponding Author

8 <sup>1</sup>Department of Molecular Microbiology and Immunology, Johns Hopkins Bloomberg School of Public  
9 Health, Baltimore, Maryland, USA

10 <sup>2</sup>Department of Molecular and Cell Biology, Johns Hopkins University, Baltimore, Maryland, USA

11 <sup>3</sup>Department of Cellular and Molecular Medicine, Johns Hopkins University School of Medicine,  
12 Baltimore, Maryland, USA

13 <sup>4</sup>Leibniz Institute for Natural Product Research and Infection Biology, Hans Knöll Institute

14 <sup>5</sup>Department of Systems and Computational Biology, Albert Einstein College of Medicine, Bronx, NY

15 <sup>6</sup>Santa Fe Institute, Santa Fe, New Mexico, USA

16 <sup>7</sup>Department of Medicine, Johns Hopkins University School of Medicine, Baltimore, United States

17

18 **Abstract**

19 The fungus *Cryptococcus neoformans* is a major human pathogen with a remarkable intracellular  
20 survival strategy that includes exiting macrophages through non-lytic exocytosis (Vomocytosis) and  
21 transferring between macrophages (Dragotcytosis) by a mechanism that involves sequential events of  
22 non-lytic exocytosis and phagocytosis. Vomocytosis and Dragotcytosis are fungal driven processes, but  
23 their triggers are not understood. We hypothesized that the dynamics of Dragotcytosis could inherit the  
24 stochasticity of phagolysosome acidification and that Dragotcytosis was triggered by fungal cell stress.  
25 Consistent with this view, fungal cells involved in Dragotcytosis reside in phagolysosomes characterized  
26 by low pH and/or high oxidative stress. Using fluorescent microscopy, qPCR, live cell video microscopy,  
27 and fungal growth assays we found that the that mitigating pH or oxidative stress abrogated  
28 Dragotcytosis frequency, that ROS susceptible mutants of *C. neoformans* underwent Dragotcytosis more  
29 frequently. Dragotcytosis initiation was linked to phagolysosomal pH and oxidative stresses and  
30 correlated with the macrophage polarization state. Dragotcytosis manifested stochastic dynamics thus  
31 paralleling the dynamics of phagosomal acidification, which correlated with the inhospitality of  
32 phagolysosomes in differently polarized macrophages. Hence, randomness in phagosomal acidification  
33 randomly created a population of inhospitable phagosomes where fungal cell stress triggered stochastic  
34 *C. neoformans* non-lytic exocytosis dynamics to escape a non-permissive intracellular macrophage  
35 environment.

36

## 37 Introduction

38 *Cryptococcus neoformans* is a pathogenic yeast that can reside in the phagolysosome of host  
39 macrophages<sup>1</sup>. Macrophages are critical cells in the pathogenesis of cryptococcosis, being involved in  
40 the containment of, and extrapulmonary dissemination of infection<sup>2</sup>. Macrophages are also involved in  
41 the pathogenesis of latent infection where the organism can survive for a long time in granulomas.  
42 Hence, *C. neoformans* survival in macrophages is critical for both the persistence and dissemination of  
43 infection. The yeasts, inhaled from the environment, manage intracellular survival by modifying the  
44 phagolysosomal environment in their own favor. The capsule of *C. neoformans* is comprised of several  
45 subunits including glucuronic acid and glucuronoxylomannan (GXM) which act as weak acids capable of  
46 buffering the environment to pH ~5<sup>3,4</sup>. *C. neoformans* also produces urease which disrupts  
47 phagolysosomal acidification by breaking down urea into carbon dioxide and ammonia, a weak base<sup>5</sup>.  
48 Additionally, *C. neoformans* are capable of exiting host macrophages through lytic exocytosis, non-lytic  
49 exocytosis (Vomocytosis)<sup>6-8</sup>, or lateral cell-to-cell transfer (Dragotcytosis)<sup>9</sup>.

50

51 We recently observed that macrophages use a bet hedging strategy in phagosomal acidification to  
52 maximize the antimicrobial properties of acidic pH for controlling the growth of ingested microbes<sup>10</sup>. By  
53 increasing the diversity of possible phagolysosomal pH, a population of macrophages will optimize its  
54 chances to inhibit pathogen growth based on pH alone. We also noticed that even small perturbations in  
55 this system could disrupt the bet-hedging strategy and that different pathogens employ various  
56 strategies to tip the odds in their own favor. *C. neoformans* interferes with the stochastic modulation of  
57 phagosomal pH by capsule buffering and urease activity<sup>3,5</sup>. Phagosomal pH varies with macrophage  
58 polarization such that alternate activated M2 macrophages are less hostile<sup>10</sup>, in terms of pH, to ingested  
59 *C. neoformans* yeasts.

60

61 A fascinating aspect of the interaction with *C. neoformans* with macrophages is the phenomenon of  
62 fungal cell transfer between two macrophages, a process we have recently termed 'Dragotcytosis'<sup>9</sup>.  
63 Dragotcytosis results from the coordinated exocytosis and phagocytosis events between adjacent  
64 macrophages<sup>9</sup>. We also noted that Dragotcytosis is favorable to *C. neoformans* as macrophages with  
65 Dragotcytosis blockaded yield more colony forming units after 24 h than those who were not blockaded.  
66 Finally, we note that Dragotcytosis is an active process, only occurring with live *C. neoformans*<sup>6</sup>. When  
67 taken together, these findings suggest Dragotcytosis is triggered by *C. neoformans* for a purpose  
68 beneficial to the yeast. However, it is unknown what specifically triggers Dragotcytosis or how  
69 transferring between macrophages confers a benefit. Notably, previous observations have established  
70 that phagolysosomal pH can modulate non-lytic exocytosis frequency, supporting the idea that pH has  
71 an important and complex role in the regulation of this system<sup>11,12</sup>.

72

73 In addition to phagolysosomal pH there are other stressors in the phagosome that could conceivably  
74 affect the rate of Dragotcytosis. The oxidative burst and the release of reactive oxygen species into the  
75 phagolysosome are also potentially important. Both ROS generation and nitric oxide synthase (NOS)  
76 activity are upregulated in M1 macrophages in response to phagocytosed pathogens<sup>13-15</sup>. NOS

77 metabolizes arginine into nitric oxide and citrulline. Conversely, Arginase (Arg), upregulated in M2  
78 macrophages) hydrolyzes arginine to ornithine and urea. Increased activity of either Arg or NOS will  
79 consume available arginine, resulting in lower efficacy of the other. Thus, M2 polarized macrophages  
80 have lower NOS activity and a less significant oxidative burst, which is thought to be one of the main  
81 reasons M2 macrophages are less effective at killing pathogens.

82

83 In this study, we analyzed the consequences of macrophage polarization and phagolysosomal stress on  
84 *C. neoformans* pathogenesis and outcome. We hypothesized that macrophages containing *C.*  
85 *neoformans* phagolysosomes that cause significant stress to the yeast by acidity and/or oxidative stress  
86 would be more likely to result in Dragotcytosis events than other *C. neoformans* containing  
87 phagolysosomes. In this regard, we tested whether the more fungicidal environment in M1  
88 macrophages was more likely to trigger Dragotcytosis than the more permissive intracellular  
89 environment of M2 macrophages. Our goal was evaluating the hypothesis that Dragotcytosis is a fungal  
90 driven mechanism for escape of a hostile environment. We found that both hostile pH and reactive  
91 oxygen species (ROS) in the phagolysosome drive Dragotcytosis and use modelling to show the potential  
92 increasing benefit of Dragotcytosis events as a function of resident phagolysosome hostility.

93

## 94 **Materials and Methods**

### 95 *Cell Strains and Culture Conditions*

96 *Cryptococcus neoformans* species complex serotype A strain H99 was originally obtained from John  
97 Perfect (Durham, NC) and *C. neoformans* H99 actin-GFP created by the May lab<sup>16</sup>. Culture stocks were  
98 stored at 80 °C. Frozen stocks were later streaked onto YPD agar and incubated at 30 °C. Liquid  
99 suspensions of cryptococcal cultures were grown in YPD overnight at 30 °C. Cryptococcal cultures were  
100 heat killed by incubating at 65 °C for 1 h. Mutant strains were obtained from a previously published  
101 knockout library<sup>17</sup>.

102

103 Bone marrow derived macrophages (BMDMs) were harvested from 6 week old C57BL/6 female mice  
104 from The Jackson Laboratory from hind leg bones and were differentiated by seeding in 10 cm tissue  
105 culture treated dishes in DMEM with 10% FBS, 1% nonessential amino acids, 1% penicillin-streptomycin,  
106 2 mM Glutamax, 1% HEPES buffer, 20% L-929 cell conditioned supernatant, 0.1% beta-mercaptoethanol  
107 for 6 days at 37 °C and 9.5% CO<sub>2</sub>. BMDMs were used for experiments within 5 days after differentiation.  
108 BMDMs were activated with 0.5 ug/mL LPS and 10 ng/mL IFN- $\gamma$  for M1 polarization or 20 ng/mL IL-4 for  
109 M2 polarization for 16 h prior to experiments.

110

### 111 *Phagolysosomal pH measurement*

112 Phagolysosomal pH was measured using ratiometric fluorescence imaging involving the use of pH-  
113 sensitive probe Oregon green 488 as described in prior studies<sup>5</sup>. Briefly, Oregon green 488 was first

114 conjugated to mAb 18B7 using Oregon Green 488 Protein Labeling Kit (ThermoFisher). BMDMs were  
115 plated at a density of  $1.25 \times 10^5$  cells/well on 24-well plate with 12 mm circular coverslip. Cells were  
116 activated with 0.5  $\mu\text{g}/\text{ml}$  LPS and 100 U/ml IFN- $\gamma$  or 20 ng/ml IL-4 as previously described at 37 °C in a  
117 9.5% CO<sub>2</sub> atmosphere overnight. Prior to infection, 2 d old live H99, heat killed H99, or anti-mouse IgG  
118 coated polystyrene bead ( $3.75 \times 10^6$  cells or beads/ml) were incubated with 10  $\mu\text{g}/\text{ml}$  Oregon green  
119 conjugated mAb 18B7 for 15 min. Macrophages were then incubated with Oregon green conjugated  
120 mAb 18B7-opsionized particles in  $3.75 \times 10^5$  cryptococcal cells or beads per well. Cells were either  
121 centrifuged immediately at 350 x g for 1 min and incubated at 37 °C for 10 min or incubated at 4 °C for  
122 30 min to synchronize ingestion and allow phagocytosis. Extracellular cryptococcal cells or beads were  
123 removed by washing three times with fresh medium, a step that prevents the occurrence of new  
124 phagocytic events. As an additional safeguard against new phagocytic events fresh media was  
125 supplemented with AlexaFluor 568 conjugated mAb 18B7 for 1 h to label extracellular particles. Samples  
126 were collected at their respective time points after phagocytosis by washing the coverslip twice with  
127 pre-warmed HBSS and placing it upside down on a MatTek petri dish (35 mm with 10 mm embedded  
128 coverslip well) with HBSS in the microwell. Images were taken by using Olympus AX70 microscopy with  
129 objective 40x at dual excitation 440 nm and 488 nm, and emission 520 nm. Images were analyzed using  
130 MetaFluor Fluorescence Ratio Imaging Software. Fluorescence intensities were used to determine the  
131 ratios of Ex488 nm/Ex440 nm that were converted to absolute pH values using a standard curve where  
132 the images are taken as above but intracellular pH of macrophages was equilibrated by adding 10  $\mu\text{M}$   
133 nigericin in pH buffer (140 mM KCl, 1 mM MgCl<sub>2</sub>, 1 mM CaCl<sub>2</sub>, 5 mM glucose, and appropriate buffer  $\leq$   
134 pH 5.0: acetate-acetic acid; pH 5.5-6.5: MES;  $\geq$  pH 7.0: HEPES. Desired pH values were adjusted using  
135 either 1 M KOH or 1 M HCl). The pH of buffers was adjusted at 3-7 using 0.5-pH unit increments.

136

### 137 *Cryptococcal Capsule Measurements*

138 Capsule measurements were acquired by measuring exclusion zones on India Ink slides and phase  
139 contrast microscopy. To determine differences between polarized macrophage incubations, *C.*  
140 *neoformans* were harvested after being ingested by macrophages for 24 h. Extracellular yeasts were first  
141 removed by washing the cells 3 times with 1 mL HBSS. Macrophages were lifted from their plates,  
142 centrifuged at 350 x g for 10 min, and resuspended in 1 mL distilled H<sub>2</sub>O. Cells were then passed through  
143 a 27  $\frac{3}{4}$  gauge needle 10 times and left incubating for 20 total min to ensure lysis. After lysis *C.*  
144 *neoformans* were pelleted via centrifugation at 2300 x g for 5 min and resuspended in 50  $\mu\text{L}$  of PBS.  
145 Slides were prepared using 8  $\mu\text{L}$  of cell mixture and 1.5  $\mu\text{L}$  India ink, then imaged on an Olympus AX70 at  
146 20x objective. Capsules and cell bodies were measured using a previously published measuring  
147 program<sup>18</sup>.

148

### 149 *NOS and Arginase Activity Measurements*

150 BMDMs were seeded at  $10^6$  cell/well in 6-well treated tissue culture plates and activated overnight for  
151 M0, M1, or M2 polarization as previously described. Prior to infection, 2 d old live H99 ( $10^6$  cells/well)  
152 were incubated with 10  $\mu\text{g}/\text{ml}$  mAb 18B7 for 10 min. Macrophages were then incubated with opsonized

153 particles at MOI 1. Cells were either centrifuged immediately at 350 x *g* for 1 min or incubated at 4 °C for  
154 30 min to synchronize ingestion and cultures were incubated at 37 °C for 10 min to allow phagocytosis.  
155 Extracellular cryptococcal cells were removed by washing three times with fresh medium, a step that  
156 prevents the occurrence of new phagocytic events. After 24 hours, cell supernatant was collected and  
157 the BMDMs were lysed with distilled water and 10 passages through a syringe with 23G needle. The  
158 supernatant was tested for NO levels via Greiss reagent kit (Millipore-Sigma G4410). Cell lysates were  
159 tested for arginase activity with arginase activity assay kit (Millipore-Sigma MAK112).

160

#### 161 *Cryptococcus neoformans* Viability and Growth Inhibition

162 BMDMs were seeded (10<sup>6</sup> cells/well) in 6-well tissue culture plates. The cells were activated overnight  
163 (16 h) with IFN $\gamma$  (0.02  $\mu$ g/mL) and (0.5  $\mu$ g) LPS for M1, IL-4 (20 ng/mL) for M2, or unstimulated for M0.  
164 The cells were then infected with a 2 d culture of *C. neoformans* opsonized with 18B7 (10  $\mu$ g/mL) at an  
165 MOI of 1 for 2 or 24 h. At the respective timepoint, the supernatant was collected and total yeast cells as  
166 well as GFP positive yeast were counted by hemocytometer and fluorescence microscopy using an  
167 Olympus AX70. *C. neoformans* ingested by adherent macrophages were imaged on a Zeiss Axiovert  
168 200M inverted scope in a live cell incubator chamber. Viability was calculated as the proportion of yeast  
169 cells expressing GFP-actin.

170

171 The collected, conditioned supernatant was then pelleted at 2300 x *g* for 5 min to remove debris and  
172 extracellular crypto. Supernatants were seeded with 5 x 10<sup>4</sup> cell / mL of *C. neoformans* and absorbance  
173 (600 nm) as well as fluorescence (GFP 488/510) was read at 0 and 24 h. Samples were prepared on glass  
174 slides with India Ink negative stain and imaged with an Olympus AX70. Growth was characterized by  
175 increase in OD600 and viability was measured as the proportion of GFP positive cells.

176

#### 177 *Dragotcytosis Frequency Measurements*

178 BMDMs were seeded (5 x 10<sup>4</sup> cells/well) in MatTek dishes. The cells were activated overnight (16 h) with  
179 IFN $\gamma$  (0.02  $\mu$ g/mL) and (0.5  $\mu$ g) LPS for M1, IL-4 (20 ng/mL) for M2, or unstimulated for M0. Cells in the  
180 MatTek dish were infected with Uvitex 2B (5  $\mu$ m/mL) stained and 18B7 (10  $\mu$ g/mL) opsonized *C.*  
181 *neoformans* at an MOI of 3 for 1 h, then supplemented with 2 mL fresh media and 18B7 mAb. In the  
182 case of drug trials this fresh media was also supplemented with bafilomycin A1 (100 nM), chloroquine (6  
183  $\mu$ m), fluconazole (20  $\mu$ g /  $\mu$ L), or amphotericin B (0.5  $\mu$ g /  $\mu$ L). MatTek dishes were then placed under a  
184 Zeiss axiovert 200M 10X magnification, incubated at 37 °C or 30 °C and 9.5% CO<sub>2</sub>, and imaged every 2  
185 min for a 24 h period. Images were then manually analyzed to identify ingested yeast cell outcomes.

186

#### 187 *Modelling*

188 To simulate the effect of Dragotcytosis on a population of *C. neoformans* in phagolysosomes we  
189 generated 10,000 hypothetical phagolysosomal pH values based on the distribution of observed

190 phagolysosomal pH in M1 polarized bead containing macrophage phagolysosomes. Each value < 4 was  
191 replaced one time by randomly determining a new phagolysosomal pH from the same distribution to  
192 simulate a Dragocytosis event from the initial macrophage to a random new one.

193

#### 194 *Data Analysis for Stochastic Signatures*

195 Discrimination of deterministic vs. stochastic dynamics was achieved using the previously characterized  
196 permutation spectrum test<sup>19</sup> and the methods outlined in our previous work<sup>10</sup>. In short, processed  
197 datasets are aligned in a vector and separated into subgroups by a scanning window of 4 units. Each of  
198 the overlapping four-unit segments are then assigned a value from 0 to 3 based on their relative size  
199 (the largest value being 3 and the least being 0) in what is referred to as an ordinal pattern. The  
200 frequencies for each pattern are calculated for the entire dataset. Determinism is characterized by  
201 observations of ordinal patterns that do not exist (forbidden patterns), whereas stochastic dynamics are  
202 characterized by every ordinal pattern existing at a non-zero frequency. In this work, the original data is  
203 the time interval between the initiation of each instance of host cell escape within an experiment.

204

#### 205 *qPCR*

206 BMDMs were seeded at  $10^6$  cell/well in 6-well treated tissue culture plates and activated overnight for  
207 M0, M1, or M2 polarization as previously described. Prior to infection, 2 d old live H99 or inert beads  
208 ( $10^6$  particles/well) were incubated with 10  $\mu$ g/ml mAb 18B7 for 10 min. Macrophages were then  
209 incubated with opsonized particles at MOI 1. Cells were either centrifuged immediately at 350 x g for 1  
210 min or incubated at 4 °C for 30 min to synchronize ingestion and cultures were incubated at 37 °C for 10  
211 min to allow phagocytosis. Extracellular cryptococcal cells were removed by washing three times with  
212 fresh medium, a step that prevents the occurrence of new phagocytic events. After 24 hours, BMDMs  
213 were resuspended in TRIzol reagent and frozen at -80°C. Total RNA was isolated from frozen cell cultures  
214 using the TRIzol reagent per the manufacturer's suggestions (Invitrogen, Carlsbad, CA). The RNA was  
215 precipitated in isopropanol and then subjected to additional purification using the RNeasy RNA isolation  
216 kit (Qiagen, Valencia, CA) according to the manufacturer's instructions. RNA was reverse transcribed to  
217 generate cDNA using a First-Strand Synthesis kit (Amersham) and random hexamers as primers. The  
218 cDNA was then used as the template for quantitative PCR using an iCycler Thermal Cycler Real-Time PCR  
219 machine (Bio-Rad, Hercules, CA). The products of PCR amplification were detected with Syber green  
220 fluorescent dye and the relative expression of each gene of interest expressed with reference to that of  
221 glyceraldehyde phosphate dehydrogenase (GAPDH). The PCR products were analyzed on Tris-Acetate-  
222 EDTA agarose gels to confirm its correct size.

223

#### 224 *Macrophage Preference Assay*

225 To ascertain whether *C. neoformans* preferred residence in macrophages as a function of host cell  
226 polarization we carried out cell transfer experiments in macrophage populations consisting of mixed M0,  
227 M1, and M2 polarized cells. BMDMs were seeded at  $3 \times 10^4$  cells per well in a 24 well tissue culture plate  
228 loaded with circular coverslips then activated overnight for M1 polarization as previously described.

229 Three separate populations of BMDMs were seeded in dishes large enough to account for an additional  
230  $3 \times 10^4$  cells per well per condition and activated overnight for M0, M1, or M2 polarization as previously  
231 described. The initial population of M1 BMDMs on coverslips was infected with  $6 \times 10^4$  18B7 opsonized  
232 *C. neoformans* yeasts per well for 1 h. The remaining three populations of uninfected BMDMs were  
233 stained with CellTracker CMFDA (Green). After the 1 h infection the three labeled populations of  
234 BMDMs were lifted with cellstripper and added to the unlabeled, infected M1 coverslips so that each  
235 coverslip had two populations of macrophages: 1. Unlabeled and infected M1 and 2. Labeled but  
236 uninfected M0, M1, or M2. The coverslips were then incubated for 24 h at 37 °C and 9.5% CO<sub>2</sub> for 24, 48,  
237 or 72 h. The cells were then fixed with 4% paraformaldehyde for 10 min at room temperature and  
238 coverslips were mounted on slides with ProLong Gold Antifade Mountant (Thermofisher) and imaged on  
239 an Olympus AX70. For each field of view the total number of each macrophage population was counted  
240 along with how many infected macrophages in each population. To correct for floating cells and ensure  
241 a proper count of total cells, a hemocytometer was used to enumerate the total number of floating cells  
242 in each sample. We assumed any floating cells were previously evenly distributed across the original  
243 sample and thus used the percent of floating cells to estimate the number of missing cells in any given  
244 sample using the formula below:

$$T'_G = \left[ \frac{T_G}{1 - \frac{SN_G}{I_G}} \right]$$

245  $T_G$  = Total green positive cells counted on a given field of view

246  $SN_G$  = Total number of green cells in supernatant per hemocytometer

247  $I_G$  = Total amount of green cells plated initially

248

#### 249 *Modeling Dragotcytosis Dynamics*

250 A population of 40,000 cells was generated consisting of 10,000 cells each of infected M1, uninfected  
251 M1, uninfected M2, and uninfected M0 macrophages. During each iteration of Dragotcytosis each  
252 infected cell had a random chance of experiencing Dragotcytosis or Vomocytosis based on observed  
253 frequencies *in vitro*. A Vomocytosed yeast was considered removed from the modeling experiment as  
254 we did not have an accurate way to model reuptake, and a Dragotcytosed yeast was randomly  
255 transferred to one of the four types of macrophage cells with no bias introduced. 10 rounds of  
256 sequential Dragotcytosis were modeled and the entire experiment was replicated 100 times.

257

#### 258 *Statistical analysis*

259 Specific statistical tests for each experiment are denoted in the figure legends with tests for multiple  
260 hypotheses. When comparing frequency of host cell exit strategies, we compared mutant strains to the  
261 wild-type strain with a test of equal proportions and Bonferroni multiple hypothesis correction.

262

## 263 Results

264

### 265 *Macrophage Polarization State Affects Frequency of Host Escape Events*

266 Given our prior findings showing different acidification dynamics in differently polarized macrophages<sup>10</sup>,  
267 we investigated whether macrophage polarization effected the frequency of Dragotcytosis. First, to  
268 ensure that our results were not confounded by differing population densities of macrophages resulting  
269 in higher or lower frequencies of events, we compared Dragotcytosis frequency to macrophage density  
270 and found no correlation (**Supplemental Figure 1**). Analysis of the pH distribution in cryptococcal  
271 phagosomes, M2 macrophages are more hospitable than M1 macrophages *C. neoformans*, having a  
272 higher proportion of macrophages at optimal growth pH (~5.5) and few phagolysosomes at inhibitory  
273 ranges ( $\leq 4$ ) (**Figure 1A**). Using M0 macrophages as a baseline measure of Dragotcytosis frequency, we  
274 find that M1 polarization increases Dragotcytosis frequency while M2 polarization completely abrogates  
275 Dragotcytosis. (**Figure 2, Supplemental Figure 2**). This result correlates the frequency of Dragotcytosis  
276 with the relative hospitality of each type of macrophage phagolysosome. When taken in context with  
277 the previously reported insight that Dragotcytosis is an active process which is beneficial for *C.*  
278 *neoformans* survival<sup>9</sup>, these data suggest that Dragotcytosis is more likely to be initiated in hostile  
279 phagolysosomes.

280

### 281 *Cryptococcus neoformans* Capsule and Cell Body Size are Unaffected by Polarization

282 The *C. neoformans* capsule is one of the most important virulence factors and determinants of infection  
283 outcome and a powerful modulator of phagolysosomal pH<sup>3</sup>. Capsule growth could modulate  
284 phagolysosomal pH by mechanically stressing the phagolysosomal membrane as it enlarges, causing the  
285 phagolysosome to become leaky<sup>20</sup>. Several aspects of cryptococcal pathology and phagolysosomal  
286 outcome are correlated to capsule size including buffering potential<sup>3,20</sup>. To investigate whether the  
287 changes in pH in differently polarized macrophages were due to capsule differences, we measured  
288 capsule sizes after infection of differently polarized macrophages. We found that the average and  
289 median capsule sizes did not appreciably differ between populations of *C. neoformans* ingested by  
290 differently polarized macrophages, nor did the average and median cell body sizes (Supplemental Figure  
291 3). Furthermore, if phagolysosomal pH was modulated by capsule size, we would expect to observe a  
292 correlation between cell radius and phagolysosomal pH. We found no indication of a correlation  
293 between particle size and phagolysosomal pH, even if we began measuring clusters of multiple particles  
294 within a single phagolysosome (**Supplemental Figure 4**).

295

### 296 *Macrophage Polarization Modulates Oxidative Response and Affects C. neoformans* Viability

297 To determine whether the macrophage oxidative response varied between polarization states in a  
298 manner that would support our hypothesis on the triggers of Dragotcytosis frequency, we measured  
299 NOS and Arg1 activity between macrophage populations. M2 macrophages had the lowest NOS activity  
300 and the highest Arg1 activity, while M1 macrophages had the highest NOS activity with the lowest Arg1  
301 activity. (**Figure 1B and C**). This data supports the notion that M2 macrophage phagolysosomes are more



302 hospitable for *C. neoformans*. Additionally, by comparing enzymatic activity between macrophages  
303 infected or uninfected with *C. neoformans* we found that infection lowers NOS activity in M0 and M2  
304 populations while increasing Arg1 activity in M1 populations (**Figure 1B** and C). Each of these changes  
305 would result in more hospitable phagolysosomes for *C. neoformans*.

306

307 We used GFP expression behind an actin promoter as a surrogate for viability for internalized *C.*  
308 *neoformans* in macrophages. Whether or not GFP negative cells are truly “dead” is a philosophical  
309 question beyond the scope of this paper, but a cell that does not express actin would certainly be  
310 incapable of division. Thus, we explored viability in terms of fungistatic rather than fungicidal qualities.  
311 We found that, at two hours post infection, *C. neoformans* ingested by M1 or M0 macrophages were  
312 less viable than those in M2 macrophages (**Figure 1D**). Additionally, we investigated the viability of  
313 extracellular *C. neoformans* and found that at 24 h post infection extracellular yeasts cultured with M1  
314 macrophages are still inhibited (**Figure 1E** and F). This is consistent with prior reports that macrophages  
315 can inhibit extracellular *C. neoformans* cells<sup>21,22</sup>. We hypothesize this inhibition is due to the buildup of  
316 NO in the extracellular media. We found no extracellular crypto at 2 hours post infection consistent with  
317 our observations that exocytosis occurs hours after ingestion.

318

319 Finally, to investigate whether *C. neoformans* infection modulates macrophage polarization during  
320 infection, we performed qPCR on RNA harvested from differently polarized macrophages 24 h after  
321 infection. We found that *C. neoformans* infection alone, in M0 macrophages, skews toward M2  
322 polarization (**Figure 1G**). This effect is augmented in M2 macrophages activated beforehand with IL-4  
323 suggesting that *C. neoformans* may actively skew macrophages toward the most hospitable state. We  
324 did not see such synergism when macrophages were stimulated with IFN $\gamma$  and LPS, or when  
325 macrophages were not stimulated.

326

### 327 *Phagolysosome pH is Associated with Dragotcytosis Frequency*

328 To probe whether phagosomal pH modulated Dragotcytosis frequency rather than other downstream  
329 effects of polarization, we altered phagosomal pH in M1 macrophages with various drugs. Chloroquine is  
330 a weak base that localizes to phagolysosomes and can be used to alkalinize macrophage phagolysosomes  
331 *in vitro*, and at 6  $\mu$ M buffers phagolysosomes to a pH optimal *C. neoformans* growth. Bafilomycin A1 is a  
332 V-ATPase inhibitor which prevents protons from being pumped into the organelle. Alkalinization of M1  
333 cryptococcal phagosomes with either drug abrogated Dragotcytosis (**Figure 2**), consistent with the  
334 notion that phagosomal acidification triggers lateral cell transfer. Interestingly, treatment with sub-  
335 inhibitory concentrations of Fluconazole (20  $\mu$ g /  $\mu$ L) and Amphotericin B (0.5  $\mu$ g /  $\mu$ L) also reduced the  
336 frequency of Dragotcytosis.

337

### 338 *Disrupting Macrophage Anti-Fungal Function Lowers Dragotcytosis Frequency*

339 If Dragotcytosis is triggered by fungal cell stress, then further disrupting the macrophages' ability to  
340 inhibit *C. neoformans* would be expected to lower its overall frequency. We investigated this using two

341 methodologies. First, we infected macrophages with *C. neoformans* induced to grow large capsules. The  
342 sheer size of cell as well as the anti-phagocytic properties of the capsule are known to inhibit  
343 macrophage uptake and promote fungal survival. We found that capsule induced *C. neoformans*  
344 Dragotcytosed less frequently and Vomocytosed dramatically more often compared to wild-type,  
345 resulting in no overall change when comparing both types of events together (**Figure 2A**). Next, we  
346 infected macrophages with wild-type *C. neoformans* at 30 °C, a temperature optimal for the fungus and  
347 suboptimal for the macrophage. We again found that Dragotcytosis was abrogated (**Figure 2A**). Taken  
348 together these results support the hypothesis that Dragotcytosis is induced when *C. neoformans* are  
349 stressed or overwhelmed by host macrophage defenses. Finally, we investigated whether melanized *C.*  
350 *neoformans* Dragotcytosed at different frequencies as melanin is known to protect from  
351 phagolysosomal stressors<sup>23-25</sup>. We found that melanized yeast underwent Dragotcytosis at a reduced  
352 rate (**Figure 2A**). This especially raised the possibility that Dragotcytosis could be triggered by general  
353 cellular stress within the phagolysosome rather than pH specifically.

354

#### 355 *Oxidative Stress Modulates Dragotcytosis Frequency*

356 To further probe whether oxidative stress had a role in triggering host cell escape, we investigated  
357 several mutant *C. neoformans* strains deficient in various oxidative stress mitigation pathways including:  
358 Superoxide Dismutases 1 and 2 (SOD1, SOD2), Catalases 1 and 3 (Cat1, Cat3), Thiorexodin 1 (TXN), and  
359 Glutathione Peroxidases 1 and 2 (GPx and GPx2)<sup>17</sup>.  $\Delta$ SOD1,  $\Delta$ Cat1,  $\Delta$ Cat3,  $\Delta$ TXN,  $\Delta$ GPx, and  $\Delta$ GPx2 strains  
360 of *C. neoformans* underwent Dragotcytosis at an increased frequency compared to the wild-type  
361 parental strain KN99, while Dragotcytosis frequency in  $\Delta$ SOD2 and  $\Delta$ TXN2 remained unchanged (**Figure**  
362 **2B**). Overall, these data support the notion that Dragotcytosis is triggered by a stressed yeast, and that  
363 increasing stress on the yeast results in increased Dragotcytosis.

364

#### 365 *Time to Host Exit Initiation is Stochastic for Exocytosis Events*

366 If Vomocytosis and/or Dragotcytosis are triggered by hostile pH and final pH is determined stochastically  
367 from a normal distribution<sup>10</sup>, then these host cell exocytosis events should also display stochastic  
368 dynamics resembling those of the upstream pH trigger. To explore whether the stochasticity of  
369 phagolysosome acidification is preserved in this system, we measured the time at which each process  
370 occurs throughout a series of videos of macrophages infected with *C. neoformans*. We found that while  
371 the time of exocytosis events was not normally distributed, these events were triggered stochastically  
372 with no forbidden ordinal patterns observed (**Figure 3A** and B). The absence of forbidden ordinals  
373 implies that the process is not deterministic, ruling out chaotic dynamics.

374

#### 375 *Simulation Data Suggests Dragotcytosis at low pH Benefits Cryptococcal Cells*

376 We hypothesized that triggering Dragotcytosis, or non-lytic exocytosis, in phagolysosomes of low pH  
377 would benefit *C. neoformans* cells by lowering the total number of yeasts within inhibitory  
378 phagolysosomes. The argument for non-lytic exocytosis is intuitive, in that the yeast leaves the  
379 phagolysosome altogether and could only result in fewer inhibitory phagolysosomes. Dragotcytosis

380 however is more nuanced as there is no obvious way for *C. neoformans* to know whether the new  
381 phagolysosome will be more or less hostile to the yeast. To explore this hypothesis, we modeled  
382 phagolysosomal pH distributions based on observed pH measurements of bead containing BMDM  
383 phagolysosomes and the established bet-hedging strategy of host macrophages in silico. We found that  
384 if a *C. neoformans* yeast were to trigger Dragotcytosis even just a single time if their original  
385 phagolysosome dropped to pH < 4, it would be enough to drop the proportion of inhibitory phagosomes  
386 from ~15% to ~1% (**Figure 3C and D**). The actual effect on *C. neoformans* survival would be even more  
387 pronounced since Dragotcytosis events are not limited to one event per yeast in vitro/vivo. We then  
388 investigated how beneficial Dragotcytosis would be at a range of pH cutoffs, assuming that an ingested  
389 *C. neoformans* would be equally likely to migrate into an M0, M1, or M2 macrophage. In the context of  
390 pH, the benefit of a Dragotcytosis event increases steadily the further away from an optimal pH the  
391 original phagolysosome is (**Figure 3E**).

392

### 393 *Cryptococcus neoformans* Does not Display an Inherent Bias for Destination Macrophages

394 While there is no obvious and apparent method for *C. neoformans* to specifically target M2  
395 macrophages as the Dragotcytosis destination, such a system could still be possible. The donor and  
396 acceptor macrophages maintain physical contact during the Dragotcytosis process, and an immune  
397 synapse could transduce signals detectable by the ingested yeast. To investigate whether *C. neoformans*  
398 shows a preference during Dragotcytosis we compared the rates of transfer from infected M1  
399 macrophages to uninfected M1 or M2 macrophages. If there is a preference, then we would expect to  
400 observe an increased amount of *C. neoformans* residing in M2 macrophages 24 HPI; if there were no  
401 preference, we would expect to see equal transfer into M1 and M2 macrophages. Instead, we see  
402 roughly an equivalent amount of transfer into M1 and M2 macrophages with slightly less transfer into  
403 M0 macrophages (**Figure 4A and B**). Based on a model of Dragotcytosis dynamics, we expect it would  
404 take approximately 4 to 5 sequential transfer events before we would be able to detect differences in  
405 population based on random chance alone (**Figure 4C**).

406

### 407 *Proposed Model for Triggering Dragotcytosis*

408 Dragotcytosis requires live *C. neoformans* and its frequency is modulated by variables that effect stress  
409 on the fungal cell (Supplemental Table 1). We synthesize these observations into a model whereby  
410 stress in the phagolysosome, resulting in fungal cell damage, triggers a program for exiting the host cell.  
411 We know that exocytosis is associated with actin flashes<sup>7,26</sup> and posit that stressed cells activate a  
412 program that manipulates the host cell to promote a choreography of events resulting in transit from  
413 the phagolysosome to outside of the host cell (Figure 5). If these events lead to exocytosis at the cell  
414 membrane region in contact with an adjoining macrophage, then non-lytic exocytosis becomes  
415 Dragotcytosis. Given that non-lytic exocytosis has been observed in mammalian, fish, insect, and  
416 protozoal cells the exit program is likely to target conserved functions in eukaryotic phagocytic cells<sup>6,8,27-</sup>  
417 <sup>29</sup>. As to whether apposition of two macrophages induces changes in the infected cell that are sensed by  
418 the fungal cell is unknown and a subject for future investigation.

419

## 420 Discussion

421 Dragotcytosis is a cellular process by which *C. neoformans* yeasts within a host macrophage  
422 phagolysosome transfer to another, proximal macrophage without lysis of the initial host<sup>6,8,9,11</sup>. During  
423 recent investigations into the receptors used in Dragotcytosis and into the phagolysosomal acidification  
424 dynamics of macrophages, we found a correlation between phagolysosomal hospitality and the  
425 frequency of Dragotcytosis and suggesting that Dragotcytosis is beneficial to, and triggered by, ingested  
426 *C. neoformans*<sup>9,10</sup>. This led us to hypothesize that fungal discomfort in the phagosome was a trigger for  
427 cell-to-cell transfer and in this study, we demonstrate that cellular stress on *C. neoformans* leads to  
428 increased Dragotcytosis frequency.

429

430 Previous studies have shown that M2 macrophages and Th2 skewed immune responses are more  
431 permissive to *C. neoformans* infection<sup>30-33</sup>. Our initial observation that M2 macrophages have, on  
432 average, higher pH phagolysosomes compared to M1 macrophages when containing inert particles  
433 offers a partial explanation of why these macrophages are more hospitable. Specifically, M2  
434 macrophage populations had the fewest phagolysosomes at an inhibitory pH (pH < 4) and the most  
435 phagolysosomes in an optimal pH range (5 < pH < 6) for fungal growth<sup>20</sup>. Additionally, we noticed that *C.*  
436 *neoformans* underwent fewer Dragotcytosis events when residing in M2 macrophage phagolysosomes  
437 compared to yeast cells resident in M1 macrophages. From this correlation, we hypothesized that if the  
438 phagolysosomal pH dropped too low for an ingested *C. neoformans* to counter with its polysaccharide  
439 capsule or urease activity<sup>3,5,34,35</sup>, then it triggered either non-lytic exocytosis or Dragotcytosis as an  
440 escape mechanism that would bring the yeast cell to the less acidic extracellular environment or into a  
441 phagolysosome of more hospitable pH, respectively.

442

443 Since phagolysosomal pH is stochastically determined with a distribution in which most phagosomes  
444 have pH > 4, it is likely that *C. neoformans* residing in a phagosome with pH < 4 would find a more  
445 hospitable home after a Dragotcytosis event<sup>10</sup>. Consequently, we probed how Dragotcytosis could  
446 modulate the effectiveness of the macrophage acidification bet hedging strategy via in silico modeling  
447 and found that even a single Dragotcytosis event triggered for *C. neoformans* residing in low pH  
448 phagolysosomes would significantly increase the likelihood of finding a less acidic phagosome. These  
449 findings could also help explain how *C. neoformans* replicates faster inside macrophages *in vivo* and *in*  
450 *vitro* than in the extracellular space, which has been attributed to faster replication in the acidic pH of  
451 the average phagosome<sup>36-38</sup>. Despite not all phagosomes being conducive to faster fungal growth,  
452 sequential Dragotcytosis events could lead *C. neoformans* to find phagolysosomes more permissive to  
453 rapid growth during an infection. These results fit well with the known data of *C. neoformans* infection  
454 in human macrophages. Human macrophage phagolysosomes acidify with different dynamics than  
455 those of mice. For example, human M2 macrophage phagolysosomes acidify to a lower pH than mouse  
456 macrophage phagolysosomes<sup>39</sup> and, perhaps as a result, humans are markedly resistant to *C.*  
457 *neoformans* infection which poses little threat to most immune competent hosts. Additionally, human  
458 macrophages undergo both Vomocytosis and Dragotcytosis with much greater frequency than mouse  
459 macrophages *in vitro*, consistent with the hypothesis that both processes are triggered by fungal  
460 residence in hostile phagolysosomes.

461

462 To probe deeper into whether there was a causal association between average phagolysosomal pH of  
463 M1 macrophages and the frequency of Dragotcytosis, we treated macrophages with either chloroquine  
464 or bafilomycin A1, keeping phagolysosomal pH near the optimal growth range of *C. neoformans* and  
465 comparable to the observed average phagolysosomal pH of M2 macrophage populations. We found that  
466 both chloroquine and bafilomycin A1 drastically reduced Dragotcytosis events, supporting the  
467 hypothesis that cellular stress is the stimulus for Dragotcytosis. We are confident that the drug  
468 treatments themselves did not have a direct effect on *C. neoformans* growth, virulence, or survivability  
469 at the concentrations used but rather modulated the host macrophage response. Chloroquine does not  
470 significantly reduce *C. neoformans* growth or viability unless ingested by macrophages and at  
471 concentrations higher than used in these experiments<sup>40</sup>. Similarly, at high concentrations Bafilomycin A1  
472 has antifungal<sup>41</sup> and even inhibits *C. neoformans* melanization<sup>42</sup> but the concentrations used here are  
473 much lower than those associated with antifungal effects<sup>43</sup>. We also treated cells with sub-inhibitory  
474 concentrations of fluconazole and amphotericin B, to explore whether these drugs would also stress the  
475 yeast in a way that promotes Dragotcytosis<sup>44</sup>. Interestingly, both antifungal drugs reduced the overall  
476 frequency of Dragotcytosis possibly because the concentrations were still too disruptive to fungal  
477 metabolism and the yeast was too compromised to transfer. In this regard, both drugs affect fungal  
478 membrane ergosterol integrity and fungal lipids may be required for the Dragotcytosis process.  
479 Alternatively, ergosterol disruption is not sensed by the fungal machinery that triggers Dragotcytosis.

480

481 To further investigate the oxidative trigger hypothesis, we characterized Dragotcytosis frequencies of  
482 several *C. neoformans* strain KN99 mutants from a knockout library during infection. We selected a  
483 variety of potential candidates based on known pathways relevant to our cellular stress hypothesis. We  
484 found that SOD1, Cat1, Cat3, TXN, GPx, and GPx2 deficient mutants underwent Dragotcytosis drastically  
485 more frequently than the wild-type parental strain, supporting the notion that Dragotcytosis is triggered  
486 by the accumulation of oxidative stress. Interestingly, knocking out SOD2 and TXN2 did not increase  
487 frequency of Dragotcytosis which may reflect the nature of the phagolysosomal oxidative stress, as  
488 SOD1 and SOD2 are known to have different efficacy against different oxidative stresses<sup>45</sup>.

489

490 If oxidative stress triggers Dragotcytosis, then reducing stress within the phagolysosome should reduce  
491 the frequency of Dragotcytosis. Melanin is known to protect *C. neoformans* from oxidative stress<sup>46</sup>.  
492 Melanized *C. neoformans* triggered Dragotcytosis at a lower frequency compared to non-melanized *C.*  
493 *neoformans*. The cryptococcal capsule is known to protect against both pH and ROS in macrophages.  
494 Macrophages infected with *C. neoformans* with large capsules manifested Dragotcytosis at a reduced  
495 rate, though Vomocytosis occurred at an increased rate. It is less clear whether Vomocytosis is triggered  
496 by the yeast or host as heat killed *C. neoformans* have been observed to undergo Vomocytosis, albeit at  
497 a drastically reduced rate<sup>7</sup>, raising the question of what could trigger one pathway opposed to the other.  
498 When macrophage infection was done at a temperature optimal for *C. neoformans* and suboptimal for  
499 macrophages: 30 °C we again found that Dragotcytosis frequency was reduced.

500

501 We next considered whether *C. neoformans* induced a bias toward M2 macrophages as acceptor  
502 macrophages in the Dragotcytosis process. Logically it would benefit the yeast as M2 macrophages were  
503 found to be more permissive, but a mechanism by which the yeast could sense interaction with an M2  
504 macrophage and initiate the Dragotcytosis process all from within the phagolysosome is difficult to  
505 imagine. Thus, we designed an experiment in which infected M1 macrophages would be seeded with  
506 labelled and uninfected M1 or M2 macrophages and we would compare the rate of transfer. If there  
507 was a preference, we should see an unequal rate of transfer between the two populations. Instead, we  
508 observed equal rates of transfer into both macrophage types. We expect that, given enough time, the  
509 distribution would shift to favor M2 macrophages by random chance. However, this was not observed  
510 due to the infrequency of sequential macrophage-to-macrophage transfers by a single cryptococcal cell  
511 during the first 24 hours of experimental observation. Thus, we find it more likely that *C. neoformans*  
512 initiates a transfer without prior knowledge of the receiver macrophage and instead would continue  
513 transferring until a hospitable phagolysosome is discovered by chance.

514

515 Dragotcytosis was stochastically initiated, reflecting the dynamics of phagolysosome acidification<sup>10</sup>.  
516 However, unlike phagosomal acidification, which manifested a normal distribution, the distribution of  
517 Dragotcytosis as a function of time was skewed away from normality. Therefore, while phagolysosomal  
518 pH contributes to triggering Dragotcytosis, it is likely not the only important trigger, a hypothesis  
519 supported by previous observations that inhibiting pH buffering via urease mutation did not increase  
520 Dragotcytosis events as would be expected if the process was triggered by pH alone<sup>5</sup>. Instead,  
521 Dragotcytosis may be triggered by an accumulation of diverse sources of cellular stress encountered in  
522 the phagolysosome. Whereas the endpoint of phagolysosomal acidification represents a bet hedging  
523 strategy by macrophages to control ingested microbes<sup>10</sup>, *C. neoformans* also appears to be employing a  
524 bet hedging strategy in exocytosis that is triggered by the bet-hedging strategy in macrophage  
525 phagolysosome acidification. In fact, *C. neoformans* may engage in its own bet hedging strategy wherein  
526 Dragotcytosis is triggered past a certain threshold of stress in which it becomes more likely that the  
527 ingested yeast will migrate to a more hospitable phagolysosome. This results in the interesting situation  
528 whereby a defensive strategy by the host cells is co-opted for survival by the fungal cell. Hence, chance  
529 outcomes in the phagolysosome trigger events that produce chance outcomes in macrophage  
530 exocytosis, implying connectivity between these two cellular processes with regards to their system  
531 dynamics. Stochastic processes are random and thus inherently unpredictable, suggesting a  
532 fundamental unpredictability to cellular processes that could extend to making host-microbe  
533 interactions not predictable.

534

535 In summary, our results consistently show that conditions that increase or decrease *C. neoformans*  
536 oxidative stress are associated with enhanced and reduced Dragotcytosis, respectively. However, it may  
537 be impossible to narrow down Dragotcytosis triggers to one specific stressor. The drugs that inhibit  
538 phagosome acidification can also inhibit autophagy, and vice versa, making it difficult to parse out the  
539 effects of only one of these systems at a time. Even the generation of reactive oxygen species is innately  
540 tied to these processes, and phagolysosomal pH itself, with the concentration of ROS in the  
541 phagolysosome increasing alongside pH with previously measured concentrations of 50  $\mu\text{M}$   $\text{O}_2^{\bullet-}$  at pH  
542 7.4 and 2  $\mu\text{M}$  at pH 4.5<sup>13</sup>. We find it more likely that a combination of cellular stresses triggers

543 Dragotcytosis and our findings suggest that initiation of Dragotcytosis is a downstream product of  
544 overwhelming stress in the phagolysosome. We note how the normally distributed phagolysosomal pH  
545 following phagocytosis randomly includes some phagolysosomes that are inhospitable to fungal cells  
546 which, in turn, triggers exocytosis with its own stochastic dynamics with a unique distribution, as other  
547 factors contribute to the exit phenomenon. Hence, stochastic dynamics in phagosomal acidification  
548 beget stochastic dynamics in non-lytic exocytosis, implying a fundamentally unpredictable host-microbe  
549 interaction at the level of cellular organelles. Such unpredictability at the cellular level is a likely  
550 contributor to our inability to predict the outcome of host-microbe interactions at the organismal  
551 level<sup>47</sup>.

552

### 553 Acknowledgements

554 This work was funded in part by NIH grant 5R01HL059842-21.

555

### 556 References

- 557 1. Levitz, S. M.; Nong, S. H.; Seetoo, K. F.; Harrison, T. S.; Speizer, R. A.; Simons, E. R. *Cryptococcus*  
558 *neoformans* resides in an acidic phagolysosome of human macrophages. *Infection and Immunity*  
559 **67**, 885–890 (1999).
- 560 2. Bojarczuk, A.; Miller, K. A.; Hotham, R.; Lewis, A.; Ogryzko, N. V.; Kamuyango, A. A.; Frost, H.;  
561 Gibson, R. H.; Stillman, E.; May, R. C.; Renshaw, S. A.; Johnston, S. A. *Cryptococcus neoformans*  
562 Intracellular Proliferation and Capsule Size Determines Early Macrophage Control of Infection.  
563 *Scientific Reports* **6**, 21489 (2016). [PMID:26887656]
- 564 3. De Leon-Rodriguez, C. M.; Fu, M. S.; Corbali, M. O.; Cordero, R. J. B.; Casadevall, A. The Capsule of  
565 *Cryptococcus neoformans* Modulates Phagosomal pH through Its Acid-Base Properties. *mSphere*  
566 **3**, (2018). [PMID:30355667]
- 567 4. Smith, L. M.; Dixon, E. F.; May, R. C. The fungal pathogen *Cryptococcus neoformans* manipulates  
568 macrophage phagosome maturation. *Cellular Microbiology* **17**, 702–713 (2015).  
569 [PMID:25394938]
- 570 5. Fu, M. S.; Coelho, C.; De Leon-Rodriguez, C. M.; Rossi, D. C. P.; Camacho, E.; Jung, E. H.; Kulkarni,  
571 M.; Casadevall, A. *Cryptococcus neoformans* urease affects the outcome of intracellular  
572 pathogenesis by modulating phagolysosomal pH. *PLOS Pathogens* **14**, e1007144 (2018).
- 573 6. Alvarez, M.; Casadevall, A. Cell-to-cell spread and massive vacuole formation after *Cryptococcus*  
574 *neoformans* infection of murine macrophages. *BMC immunology* **8**, 16 (2007).
- 575 7. Alvarez, M.; Casadevall, A. Phagosome Extrusion and Host-Cell Survival after *Cryptococcus*  
576 *neoformans* Phagocytosis by Macrophages. *Current Biology* **16**, 2161–2165 (2006).
- 577 8. Ma, H.; Croudace, J. E.; Lammas, D. A.; May, R. C. Direct cell-to-cell spread of a pathogenic yeast.  
578 *BMC immunology* **8**, 15 (2007). [PMID:17705831]
- 579 9. Dragotakes, Q.; Fu, M. S.; Casadevall, A. Dragotcytosis: Elucidation of the Mechanism for  
580 *Cryptococcus neoformans* Macrophage-to-Macrophage Transfer. *The Journal of Immunology*

- 581           ji1801118 (2019). [PMID:30877168]
- 582   **10.**    Dragotakes, Q.; Stouffer, K. M.; Fu, M. S.; Sella, Y.; Youn, C.; Yoon, O. I.; De Leon-Rodriguez, C. M.;  
583           Freij, J. B.; Bergman, A.; Casadevall, A. Macrophages use a bet-hedging strategy for antimicrobial  
584           activity in phagolysosomal acidification. *The Journal of clinical investigation* **130**, 3805–3819  
585           (2020). [PMID:32298242]
- 586   **11.**    Ma, H.; Croudace, J. E.; Lammas, D. A.; May, R. C. Expulsion of Live Pathogenic Yeast by  
587           Macrophages. *Current Biology* **16**, 2156–2160 (2006). [PMID:17084701]
- 588   **12.**    Nicola, A. M.; Robertson, E. J.; Albuquerque, P.; Derengowski, L. da S.; Casadevall, A. Nonlytic  
589           Exocytosis of *Cryptococcus neoformans* from Macrophages Occurs In Vivo and Is Influenced by  
590           Phagosomal pH. *mBio* **2**, e00167-11 (2011). [PMID:21828219]
- 591   **13.**    Slauch, J. M. How does the oxidative burst of macrophages kill bacteria? Still an open question.  
592           *Molecular Microbiology* **80**, 580–583 (2011).
- 593   **14.**    Nguyen, G. T.; Green, E. R.; Meccas, J. *Frontiers in Cellular and Infection Microbiology*. Frontiers  
594           Media S.A. August 25, 2017
- 595   **15.**    Nordenfelt, P.; Tapper, H. Phagosome dynamics during phagocytosis by neutrophils. *Journal of*  
596           *Leukocyte Biology* **90**, 271–284 (2011). [PMID:21504950]
- 597   **16.**    Voelz, K.; Johnston, S. A.; Rutherford, J. C.; May, R. C. Automated analysis of cryptococcal  
598           macrophage parasitism using GFP-tagged cryptococci. *PLoS. ONE* **5**, e15968 (2010).
- 599   **17.**    Liu, O. W.; Chun, C. D.; Chow, E. D.; Chen, C.; Madhani, H. D.; Noble, S. M. Systematic Genetic  
600           Analysis of Virulence in the Human Fungal Pathogen *Cryptococcus neoformans*. *Cell* **135**, 174–  
601           188 (2008).
- 602   **18.**    Dragotakes, Q.; Casadevall, A. Automated measurement of cryptococcal species polysaccharide  
603           capsule and cell body. *Journal of Visualized Experiments* **2018**, (2018).
- 604   **19.**    Zunino, L.; Soriano, M. C.; Rosso, O. A. Distinguishing chaotic and stochastic dynamics from time  
605           series by using a multiscale symbolic approach. *Phys. Rev. E. Stat. Nonlin. Soft. Matter Phys* **86**,  
606           46210 (2012).
- 607   **20.**    De Leon-Rodriguez, C. M.; Rossi, D. C. P.; Fu, M. S.; Dragotakes, Q.; Coelho, C.; Guerrero Ros, I.;  
608           Caballero, B.; Nolan, S. J.; Casadevall, A. The Outcome of the *Cryptococcus neoformans*–  
609           Macrophage Interaction Depends on Phagolysosomal Membrane Integrity. *The Journal of*  
610           *Immunology* **201**, 583–603 (2018).
- 611   **21.**    Weinberg, P. B.; Becker, S.; Granger, D. L.; Koren, H. S. Growth inhibition of *Cryptococcus*  
612           *neoformans* by human alveolar macrophages. *Am. Rev. Resp. Dis* **136**, 1242–1247 (1987).
- 613   **22.**    Granger, D. L.; Perfect, J. R.; Durack, D. T. Macrophage-mediated fungistasis in vitro: requirements  
614           for intracellular and extracellular cytotoxicity. *J. Immunol* **136**, 672–680 (1986).
- 615   **23.**    Jacobson, E. S.; Hove, E.; Emery, H. S. Antioxidant function of melanin in black fungi. *Infect.*  
616           *Immun* **63**, 4944–4945 (1995).
- 617   **24.**    Bustamante, J.; Bredeston, L.; Malanga, G.; Mordoh, J. Role of melanin as a scavenger of active  
618           oxygen species. *Pigment Cell Res* **6**, 348–353 (1993).



- 619 **25.** Nosanchuk, J. D.; Casadevall, A. The contribution of melanin to microbial pathogenesis. *Cell*  
620 *Microbiol* **5**, 203–223 (2003).
- 621 **26.** Johnston, S. A.; May, R. C. The human fungal pathogen *Cryptococcus neoformans* escapes  
622 macrophages by a phagosome emptying mechanism that is inhibited by Arp2/3 complex-  
623 mediated actin polymerisation. *PLoS Pathog* **6**, e1001041 (2010).
- 624 **27.** Davis, J. M.; Huang, M.; Botts, M. R.; Hull, C. M.; Huttenlocher, A. A Zebrafish Model of  
625 Cryptococcal Infection Reveals Roles for Macrophages, Endothelial Cells, and Neutrophils in the  
626 Establishment and Control of Sustained Fungemia. *Infection and Immunity* **84**, 3047–3062 (2016).
- 627 **28.** Qin, Q.-M.; Luo, J.; Lin, X.; Pei, J.; Li, L.; Ficht, T. A.; de Figueiredo, P. Functional analysis of host  
628 factors that mediate the intracellular lifestyle of *Cryptococcus neoformans*. *PLoS pathogens* **7**,  
629 e1002078 (2011).
- 630 **29.** Chrisman, C. J.; Alvarez, M.; Casadevall, A. Phagocytosis of *Cryptococcus neoformans* by, and  
631 Nonlytic Exocytosis from, *Acanthamoeba castellanii*. *Applied and Environmental Microbiology* **76**,  
632 6056–6062 (2010). [PMID:20675457]
- 633 **30.** Hoag, K. A.; Lipscomb, M. F.; Izzo, A. A.; Street, N. E. IL-12 and IFN-gamma are required for  
634 initiating the protective Th1 response to pulmonary cryptococcosis in resistant C.B-17 mice. *Am.*  
635 *J. Respir. Cell. Mol. Biol* **17**, 733–739 (1997).
- 636 **31.** Chen, G.-H.; McDonald, R. A.; Wells, J. C.; Huffnagle, G. B.; Lukacs, N. W.; Toews, G. B. The  
637 Gamma Interferon Receptor Is Required for the Protective Pulmonary Inflammatory Response to  
638 *Cryptococcus neoformans*. *Infection and Immunity* **73**, 1788–1796 (2005). [PMID:15731080]
- 639 **32.** Decken, K.; Kohler, G.; Palmer-Lehmann, K.; Wunderlin, A.; Mattner, F.; Magram, J.; Gately, M. K.;  
640 Alber, G. Interleukin-12 is essential for a protective Th1 response in mice infected with  
641 *Cryptococcus neoformans*. *Infect. Immun* **66**, 4994–5000 (1998).
- 642 **33.** Osterholzer, J. J.; Surana, R.; Milam, J. E.; Montano, G. T.; Chen, G.-H. H.; Sonstein, J.; Curtis, J. L.;  
643 Huffnagle, G. B.; Toews, G. B.; Olszewski, M. A. Cryptococcal urease promotes the accumulation  
644 of immature dendritic cells and a non-protective T2 immune response within the lung. *Am J*  
645 *Pathol* **174**, 932–943 (2009). [PMID:19218345]
- 646 **34.** Cox, G. M.; Mukherjee, J.; Cole, G. T.; Casadevall, A.; Perfect, J. R. Urease as a virulence factor in  
647 experimental cryptococcosis. *Infection and immunity* **68**, 443–448 (2000). [PMID:10639402]
- 648 **35.** Olszewski, M. A.; Noverr, M. C.; Chen, G. H.; Toews, G. B.; Cox, G. M.; Perfect, J. R.; Huffnagle, G.  
649 B. Urease expression by *Cryptococcus neoformans* promotes microvascular sequestration,  
650 thereby enhancing central nervous system invasion. *Am. J. Pathol* **164**, 1761–1771 (2004).
- 651 **36.** Feldmesser, M.; Kress, Y.; Novikoff, P.; Casadevall, A. *Cryptococcus neoformans* is a facultative  
652 intracellular pathogen in murine pulmonary infection. *Infection and Immunity* **68**, 4225–4237  
653 (2000).
- 654 **37.** Diamond, R. D.; Bennett, J. E. Growth of *Cryptococcus neoformans* within human macrophages in  
655 vitro. *Infection and Immunity* **7**, 231–236 (1973). [PMID:4697791]
- 656 **38.** DeLeon-Rodriguez, C. M.; Casadevall, A. *Cryptococcus neoformans*: Tripping on Acid in the  
657 Phagolysosome. *Frontiers in Microbiology* **7**, 164 (2016).

- 658 **39.** Canton, J.; Khezri, R.; Glogauer, M.; Grinstein, S. Contrasting phagosome pH regulation and  
659 maturation in human M1 and M2 macrophages. *Molecular biology of the cell* **25**, 3330–3341  
660 (2014). [PMID:25165138]
- 661 **40.** Levitz, S. M.; Harrison, T. S.; Tabuni, A.; Liu, X. Chloroquine induces human mononuclear  
662 phagocytes to inhibit and kill *Cryptococcus neoformans* by a mechanism independent of iron  
663 deprivation. *Journal of Clinical Investigation* **100**, 1640–1646 (1997).
- 664 **41.** WERNER, G.; HAGENMAIER, H.; DRAUTZ, H.; BAUMGARTNER, A.; ZÄHNER, H. Metabolic products  
665 of microorganisms. 224. Bafilomycins, a new group of macrolide antibiotics. Production,  
666 isolation, chemical structure and biological activity. *The Journal of Antibiotics* **37**, 110–117 (1984).
- 667 **42.** Erickson, T.; Liu, L.; Gueyikian, A.; Zhu, X.; Gibbons, J.; Williamson, P. R. Multiple virulence factors  
668 of *Cryptococcus neoformans* are dependent on VPH1. *Molecular Microbiology* **42**, 1121–1131  
669 (2001).
- 670 **43.** Harrison, T. S.; Griffin, G. E.; Levitz, S. M. Conditional lethality of the diprotic weak bases  
671 chloroquine and quinacrine against *Cryptococcus neoformans*. *J. Infect. Dis* **182**, 283–289 (2000).
- 672 **44.** Nosanchuk, J. D.; Cleare, W.; Franzot, S. P.; Casadevall, A. Amphotericin B and fluconazole affect  
673 cellular charge, macrophage phagocytosis, and cellular morphology of *Cryptococcus neoformans*  
674 at subinhibitory concentrations. *Antimicrob. Agents Chemotherap* **43**, 233–239 (1999).  
675 [PMID:9925511]
- 676 **45.** FrÄ©alle, E.; NoÄ«l, C.; Viscogliosi, E.; Camus, D.; Dei-Cas, E.; Delhaes, L. Manganese superoxide  
677 dismutase in pathogenic fungi: An issue with pathophysiological and phylogenetic involvements.  
678 *FEMS Immunology & Medical Microbiology* **45**, 411–422 (2005).
- 679 **46.** Wang, Y.; Aisen, P.; Casadevall, A. *Cryptococcus neoformans* melanin and virulence: mechanism  
680 of action. *Infect. Immun* **63**, 3131–3136 (1995). [PMID:7622240]
- 681 **47.** Casadevall, A.; Pirofski, L. anne. What Is a Host? Attributes of Individual Susceptibility. *Infect*  
682 *Immun* **86**, (2018). [PMID:29084893]
- 683

684 **Figures**

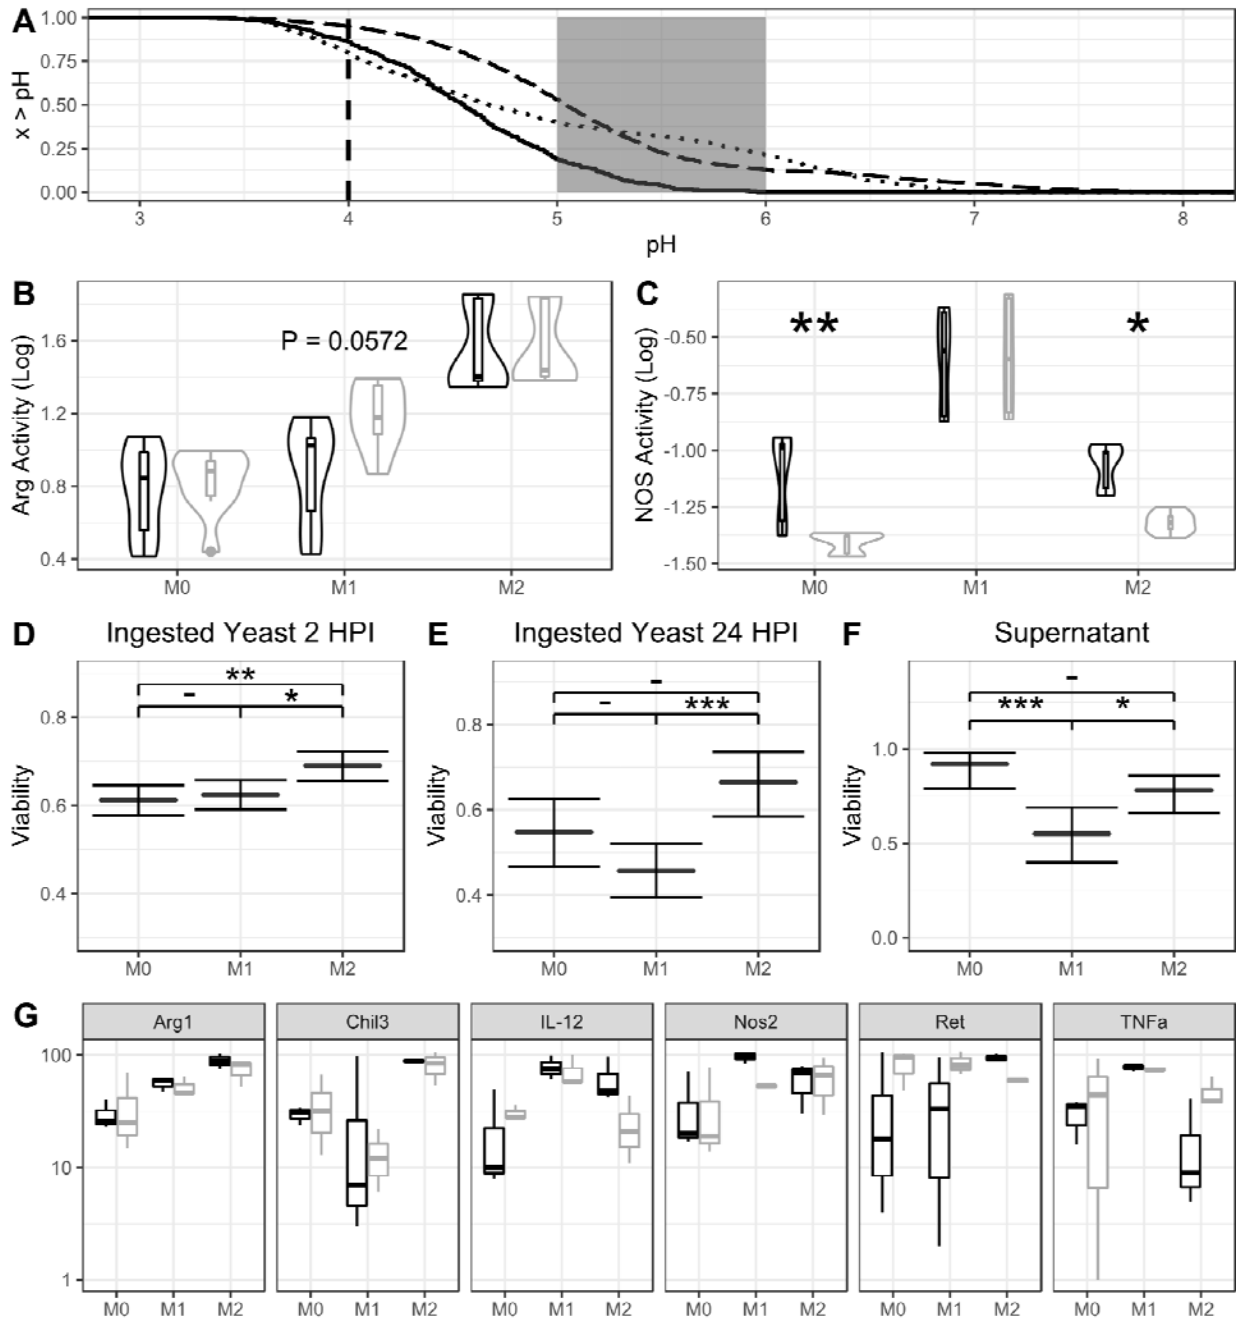

685

686 **Figure 1.** pH and Oxidative response in BMDM populations. **A.** Inverse empirical cumulative distribution  
 687 functions for bead containing phagolysosome pH data measured in M0 (dotted), M1 (solid), and M2  
 688 (dashed) macrophage populations. The dashed line at pH 4 represents the point at which pH inhibits *C.*  
 689 *neoformans* replication while the gray area between pH 5 and 6 represents the optimal growth pH for *C.*  
 690 *neoformans*. Hospitality of each population is estimated by the number of phagolysosomes within each  
 691 of these regions. **B.** Arg-1 activity of differently polarized BMDMs infected (gray) or uninfected (black)  
 692 with *C. neoformans*. M2 have the highest overall activity, and activity is promoted with infection in M1  
 693 populations. **C.** NOS activity of differently polarized BMDMs infected (gray) or uninfected (black) with *C.*

694 *neoformans*. M1 have the highest overall activity, and activity is decreased with infection in both M0  
695 and M2 populations. Significance determined by 2-way ANOVA with Tukey's HSD comparisons. **D.**  
696 Viability of *C. neoformans* ingested by macrophage populations after 2 h. **E.** Viability of *C. neoformans*  
697 ingested by macrophage populations after 2 h. **F.** Viability of extracellular *C. neoformans* after 24 h  
698 incubation with macrophages. **G.** qPCR data from differently polarized BMDMs uninfected (black) and  
699 infected (gray) with *C. neoformans* 24 HPI. Values are normalized to the respective M0 uninfected fold  
700 induction. \*, \*\*, \*\*\* represent  $P < 0.05$ , 0.01, and 0.001, respectively. ANOVA with Tukey comparisons  
701 were used in panels B and C while a test of equal proportions with Bonferroni correction was used in  
702 panels D and E.

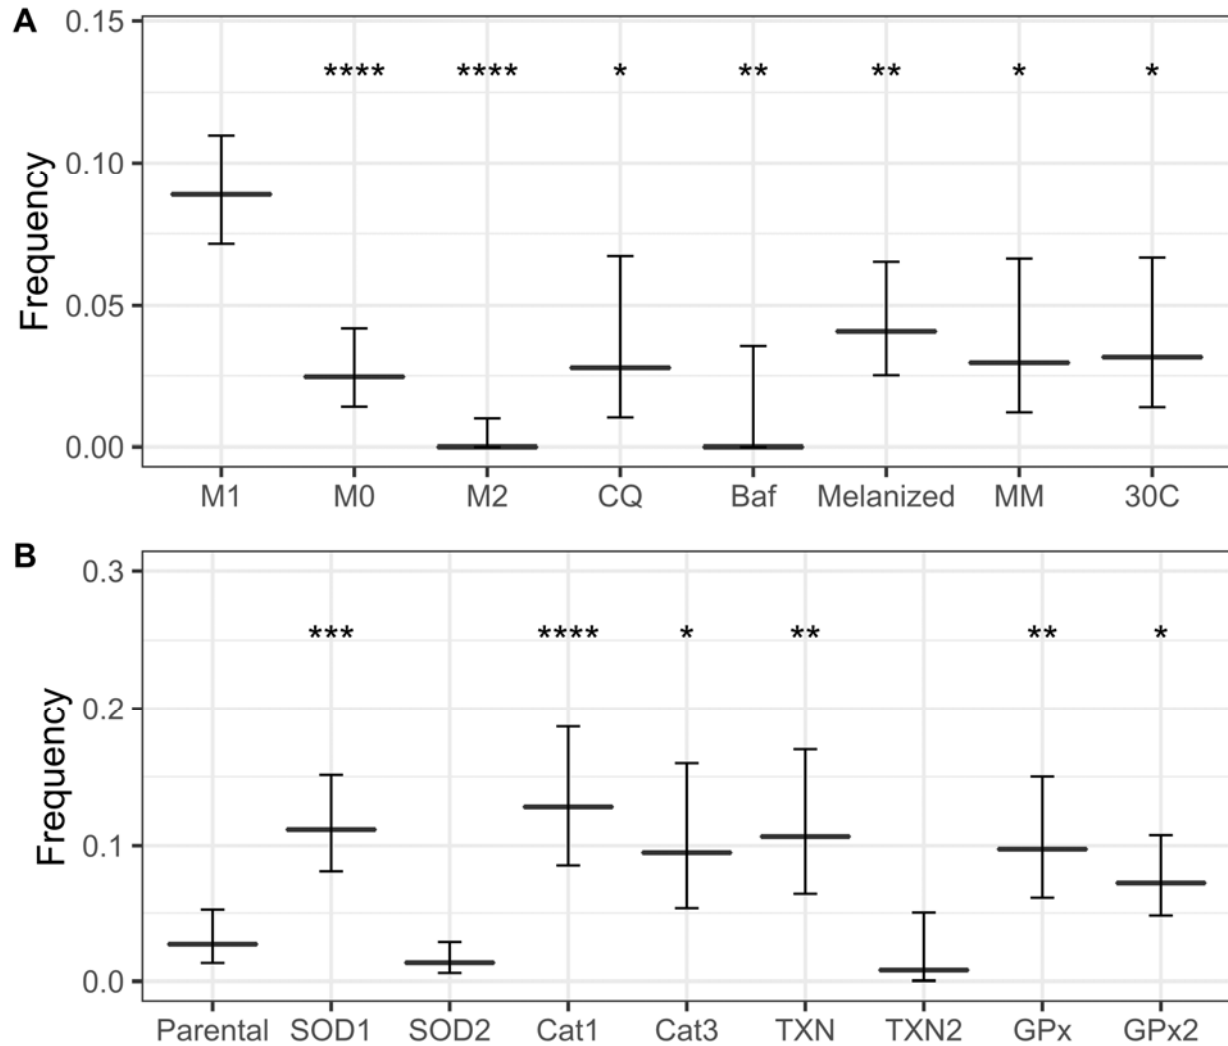

703

704 **Figure 2.** Dragotcytosis frequencies of *C. neoformans* ingested BMDMs under various conditions. **A.** *C.*  
705 *neoformans* strain H99 frequencies of Dragotcytosis. M0 and M2 macrophages have lower frequencies  
706 of Dragotcytosis overall compared to M1. Alkalizing the phagolysosomes of M1 macrophages with  
707 chloroquine (Chloro) or bafilomycin A1 (BafA), protecting from ROS with melanin (Melanized),  
708 stimulating capsule growth with minimal media conditions (MM), and inhibiting macrophage function  
709 with low temperature (30C) also abrogate Dragotcytosis frequency. **B.** *C. neoformans* strain KN99α  
710 Dragotcytosis frequencies among infected macrophages. Knocking out genes directly involved in  
711 oxidative stress mitigation increases frequency of Dragotcytosis. Graphs depict means with 95%  
712 confidence intervals. \*, \*\*, \*\*\*, \*\*\*\* denote  $P < 0.05$ , 0.01, 0.001, and 0.0001 via test of equal  
713 proportions compared to M1 with Bonferroni correction for multiple hypotheses.

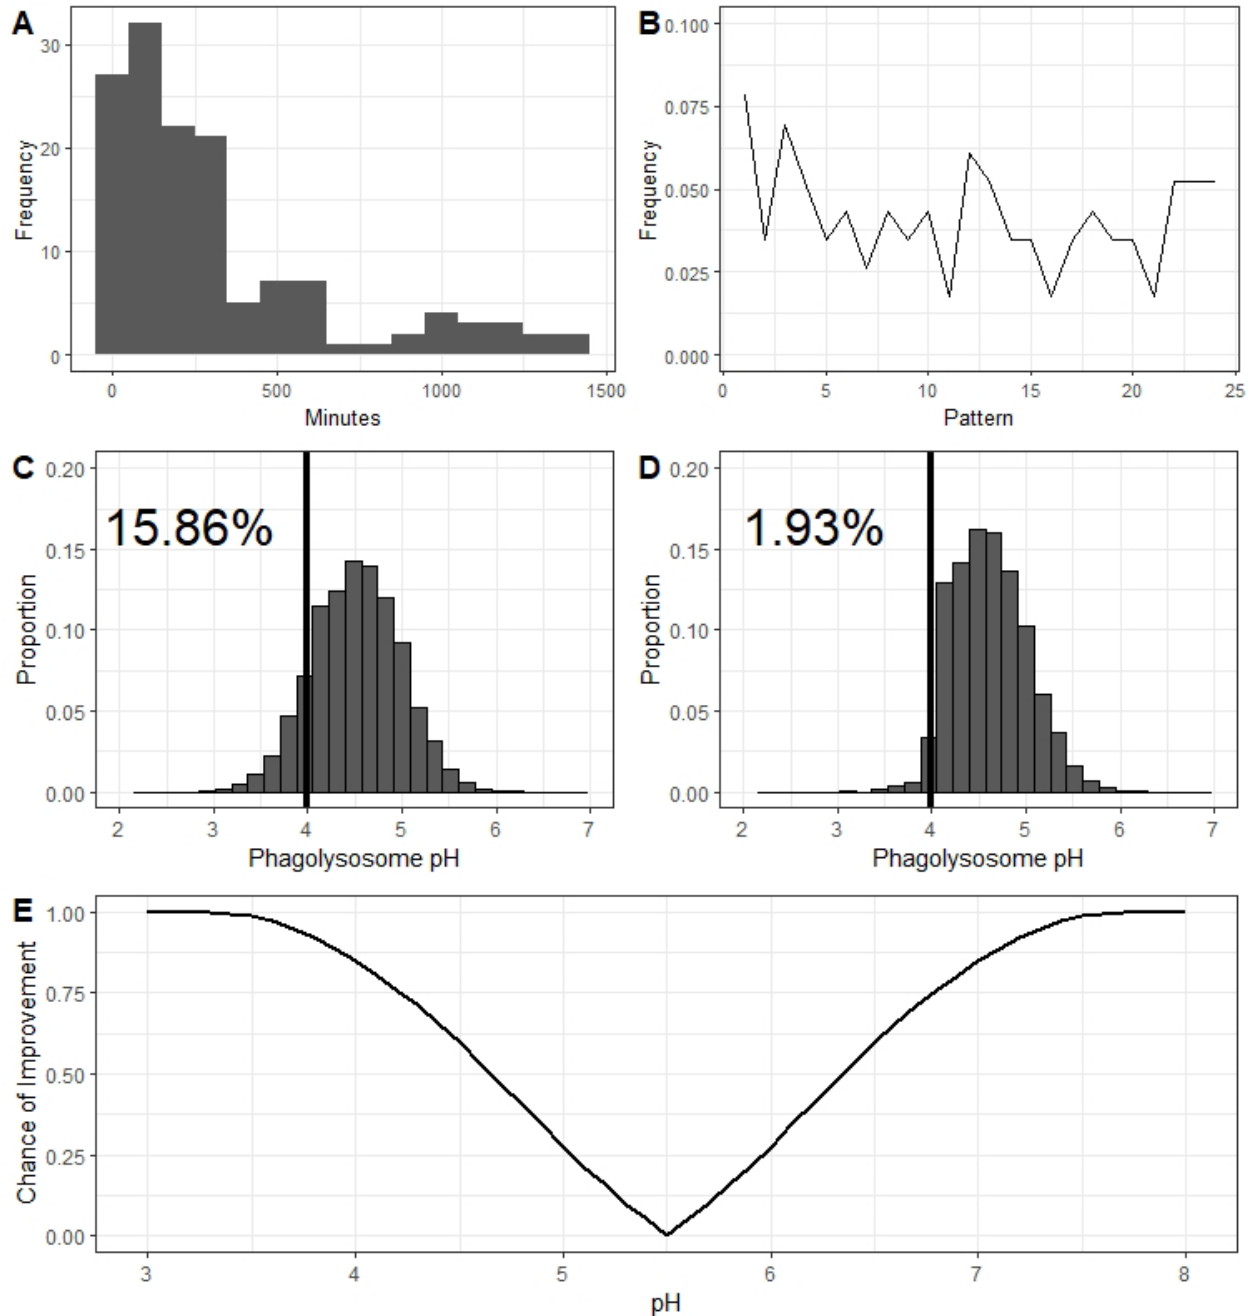

714

715 **Figure 3.** Dynamics of Dragotcytosis. **A.** Distribution of the times at which *C. neoformans* yeasts initiated  
716 host cell exit strategies. Both Vomocytosis and Dragotcytosis events are represented here. Bin widths  
717 are set to 100 and the data depicted spans 139 samples from 12 experiments. **B.** Ordinal pattern  
718 analysis for the intervals between events. Intervals were gathered and analyzed within experiments and  
719 total proportions of individual ordinal patterns summed between experiments. **C.** Hypothetical  
720 phagolysosomal pH distributions if *C. neoformans* particles were to undergo no Dragotcytosis events. **D.**  
721 Modelled phagolysosomal pH distributions if *C. neoformans* particles were to undergo one Dragotcytosis  
722 event if their resident phagolysosomal pH is < 4. Even a single round of low pH triggered Dragotcytosis  
723 drastically shifts the distribution to the right resulting in a greater proportion of *C. neoformans*  
724 hospitable phagolysosomes. Labelled percent values reflect the proportion of hypothetical

725 phagolysosomes inhibitory to *C. neoformans* (pH < 4, black vertical line) in each scenario. **E.** Hypothetical  
726 chance of an ingested *C. neoformans* to find a more hospitable phagolysosome in the context of pH  
727 assuming equal likelihood of migrating to an M0, M1, or M2 macrophage.

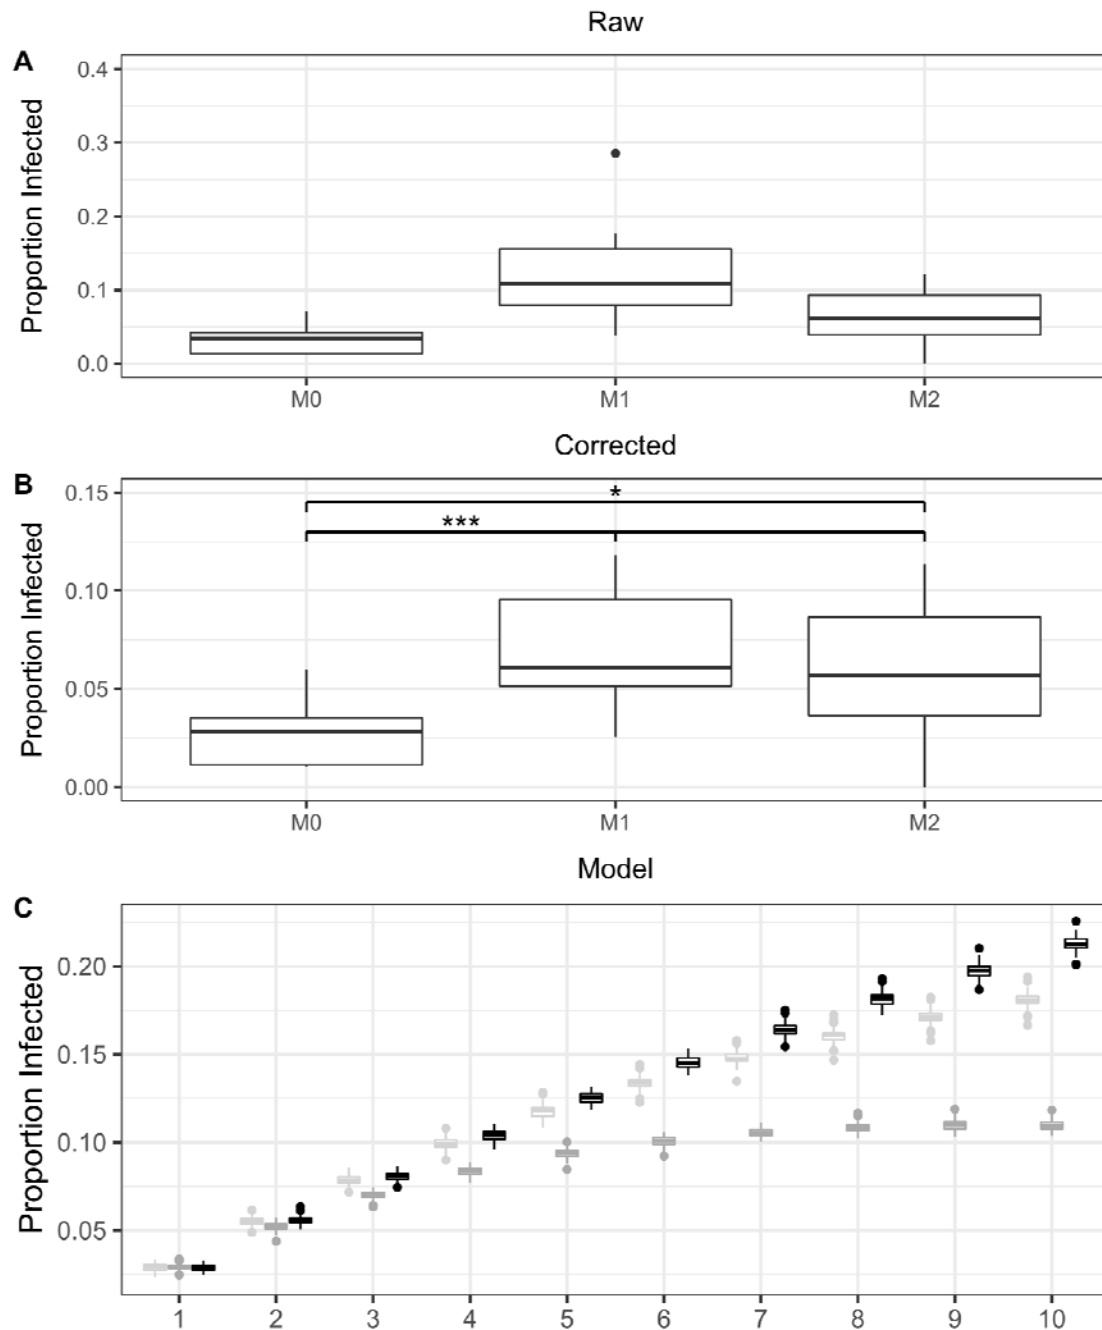

728

729 **Figure 4.** Comparisons of labelled macrophage populations and the proportion of which have ingested *C.*  
730 *neoformans* 24 hours post infection. **A.** The uncorrected proportion of adherent macrophages  
731 containing *C. neoformans* at the end of the infection. **B.** The proportion of macrophages containing  
732 yeast after correcting for floating cells. Both the proportion of labelled cells compared to the original  
733 population of infected M1 macrophages as well as the frequency of labelled cells which ingested *C.*  
734 *neoformans* remained consistent throughout the time course. \*, \*\*\* signify  $P < 0.05$  and  $0.001$  via

735 ANOVA with Tukey multiple comparisons. C. A model depicting expected proportions of infected cells  
736 based only on random chance after sequential Dragocytosis events for M0 (light gray), M1 (dark gray),  
737 and M2 (black) macrophages.



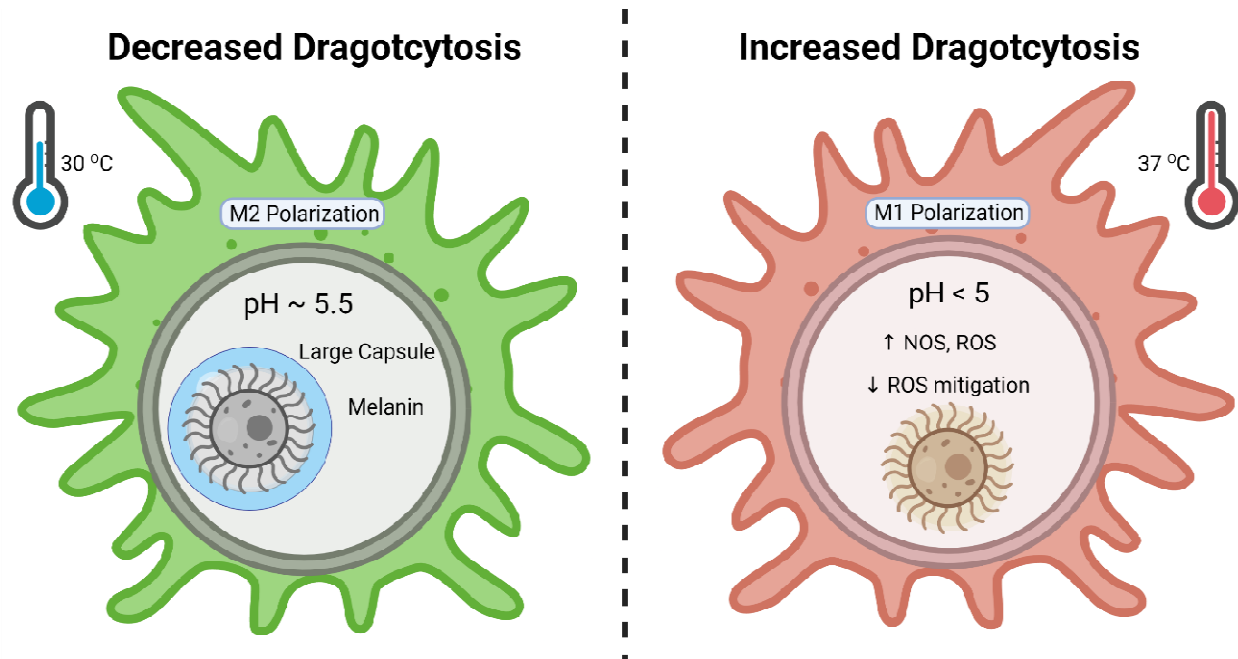

738

739 Figure 5

740 Graphical summary of conditions with effects on Dragotcytosis frequency. Figure was created with  
741 BioRender.com.

742 Supplemental Table 1. Summary of variable effects on Dragotcytosis frequency.

| Frequency | Variable                                 | Effect                                                                                                                                           |
|-----------|------------------------------------------|--------------------------------------------------------------------------------------------------------------------------------------------------|
| Increase  | Macrophage M1 Polarization               | Enhanced antifungal activity (increased NO)                                                                                                      |
|           | Decreased Phagosome pH                   | Increased phagolysosome fungistatic mechanisms<br>Reduced fungal growth                                                                          |
|           | CN Superoxide 1 Deficiency               | Enhanced fungal susceptibility to oxidants                                                                                                       |
|           | CN Catalase 1 and 3 Deficiency           | Enhanced fungal susceptibility to oxidants                                                                                                       |
|           | CN Thioredoxin Deficiency                | Enhanced fungal susceptibility to oxidants                                                                                                       |
|           | CN Glutathione Peroxidase Deficiency     | Enhanced fungal susceptibility to oxidants                                                                                                       |
| Decrease  | Macrophage M2 Polarization               | Reduced antifungal activity                                                                                                                      |
|           | Increased Phagosome pH                   | Reduced phagolysosome fungistatic mechanisms<br>Enhanced fungal replication                                                                      |
|           | Bafilomycin A1 and Chloroquine Treatment | Increases phagolysosomal pH, reduced phagolysosome fungistatic mechanisms                                                                        |
|           | Fluconazole and Amphotericin B Treatment | Disrupts fungal ergosterol processes                                                                                                             |
|           | Melanin                                  | Reduced fungal susceptibility to oxidants                                                                                                        |
|           | CN Urease Deficiency                     | Decreased phagosomal pH, increased intracellular CN replication, disrupted phagolysosomal membrane, increased apoptotic macrophages <sup>5</sup> |
|           | Increased Capsule Size                   | Increased buffering potential, reduced macrophage phagocytosis efficiency                                                                        |
|           | Temperature (30 °C)                      | Reduced macrophage function                                                                                                                      |

743

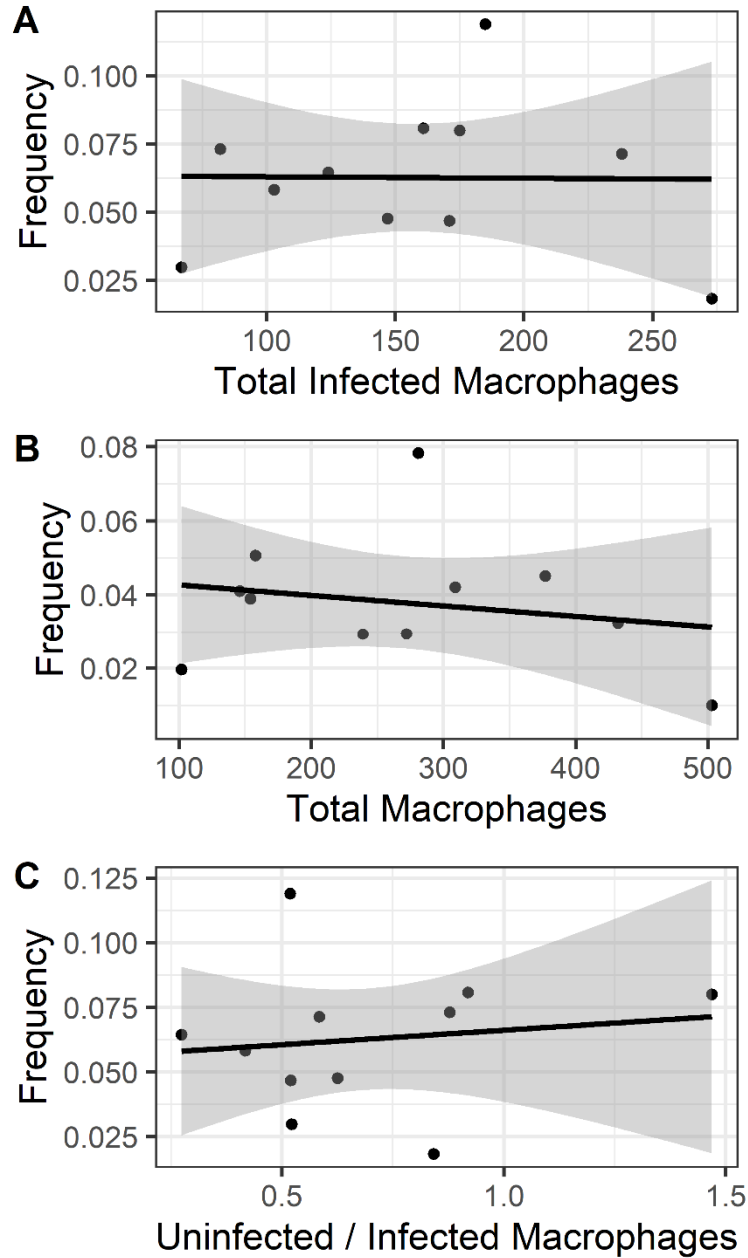

744

745 **Supplemental Figure 1.** Frequency of Dragotcytosis events of ingested *C. neoformans* H99 yeasts  
746 according to population size of infected or total macrophages. **A.** Dragotcytosis frequency did not  
747 correlate with total number of infected macrophages. **B.** Dragotcytosis frequency did not correlate with  
748 the density of total macrophages. **C.** Dragotcytosis frequency did not correlate with the proportion of  
749 uninfected to infected macrophages.

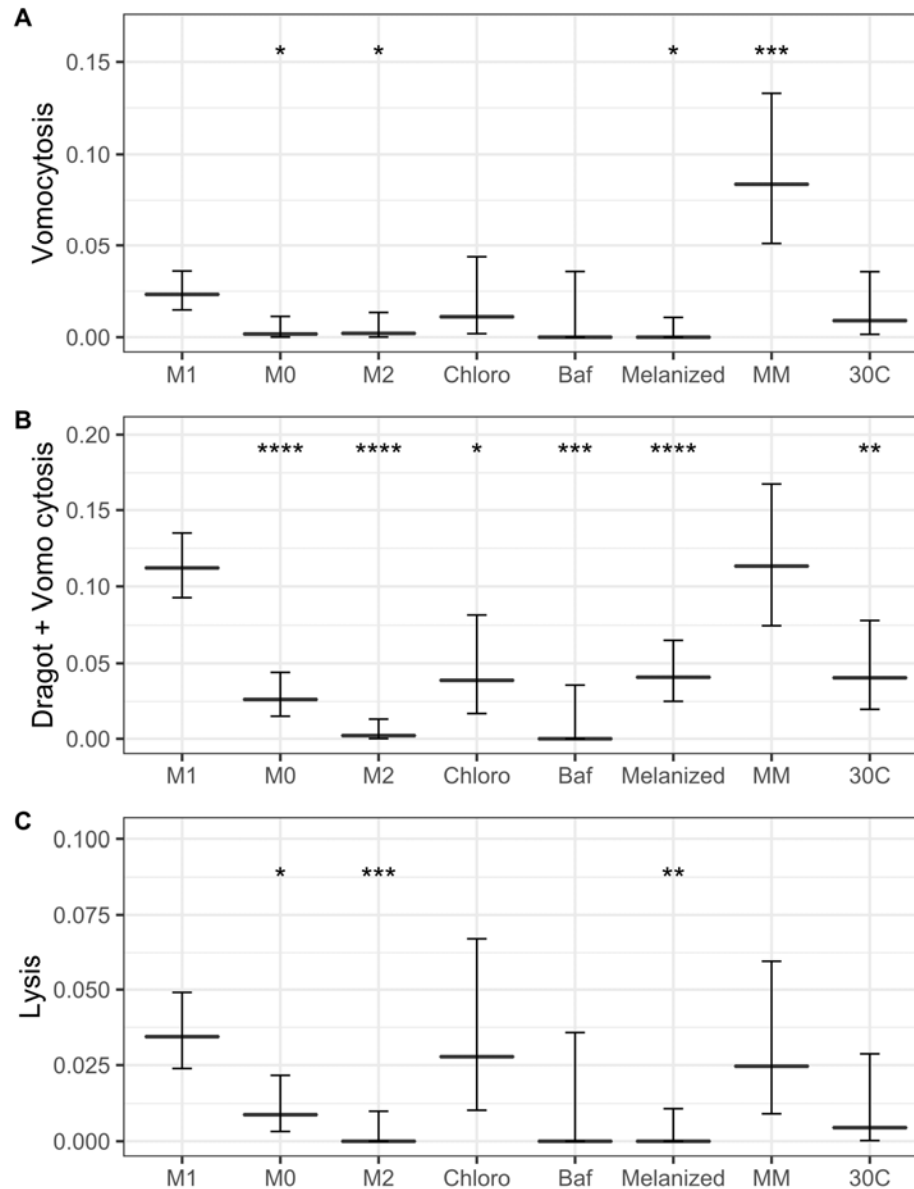

750

751 **Supplemental Figure 2.** Event frequencies of *C. neoformans* strain H99 ingested by BMDMs under  
752 various pH related conditions. **A.** Vomocytosis frequency among infected macrophages. **B.** Combined  
753 frequency of Dragotcytosis and Vomocytosis among infected macrophages. **C.** Lysis frequency among  
754 infected macrophages. All conditions have similar frequency. Event frequencies of wild-type KN99 strain  
755 and mutant *C. neoformans* after ingestion by M1 polarized BMDMs. \*, \*\*, \*\*\*, \*\*\*\* signify  $P < 0.05$ ,  
756 0.01, 0.001, and 0.0001 via test of equal proportions, respectively. Bonferroni correction was applied for  
757 multiple hypotheses.

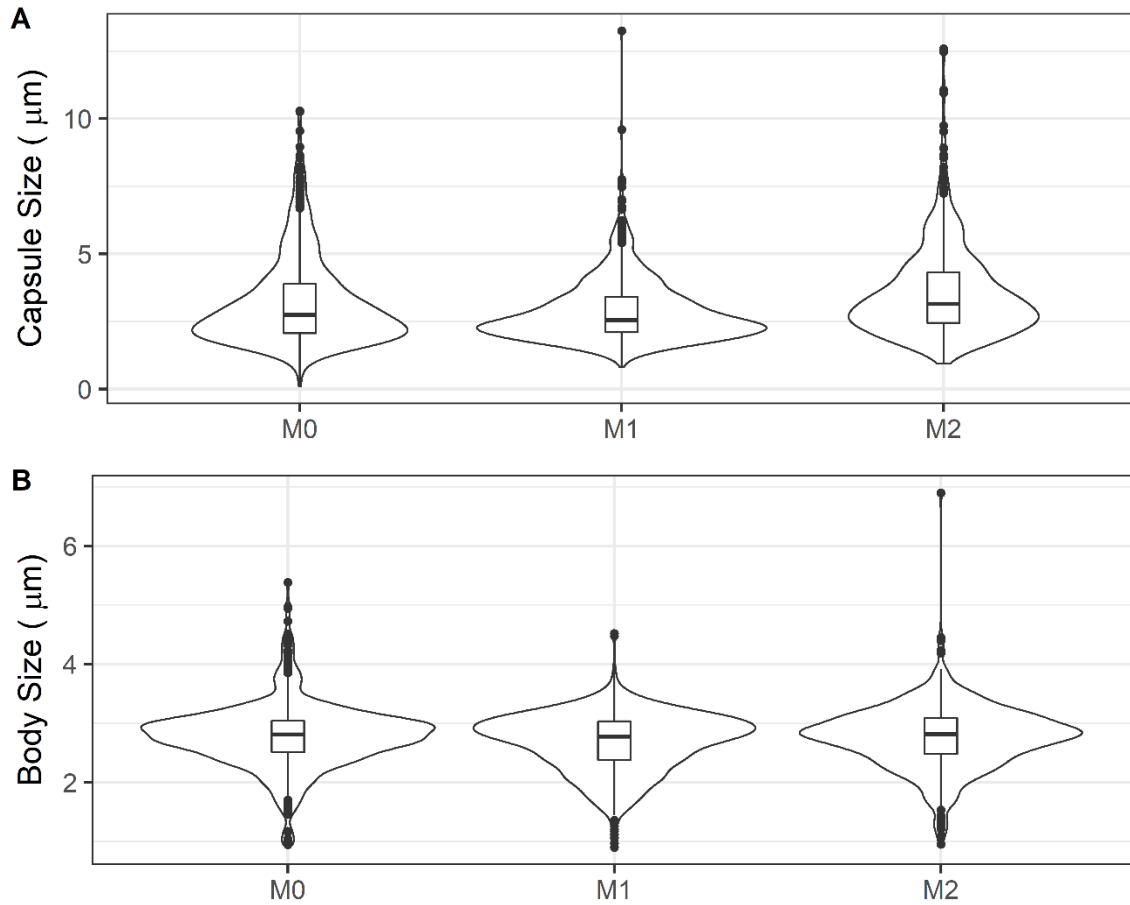

758

759 **Supplemental Figure 3.** Capsule and cell body size of *C. neoformans* isolated 24 hours after ingestion by  
760 BMDMs. Capsules and cell bodies are measured by preparing and imaging India Ink slides and a  
761 previously published<sup>18</sup> measuring code. No significant differences were found between the polarization  
762 states of host macrophages.

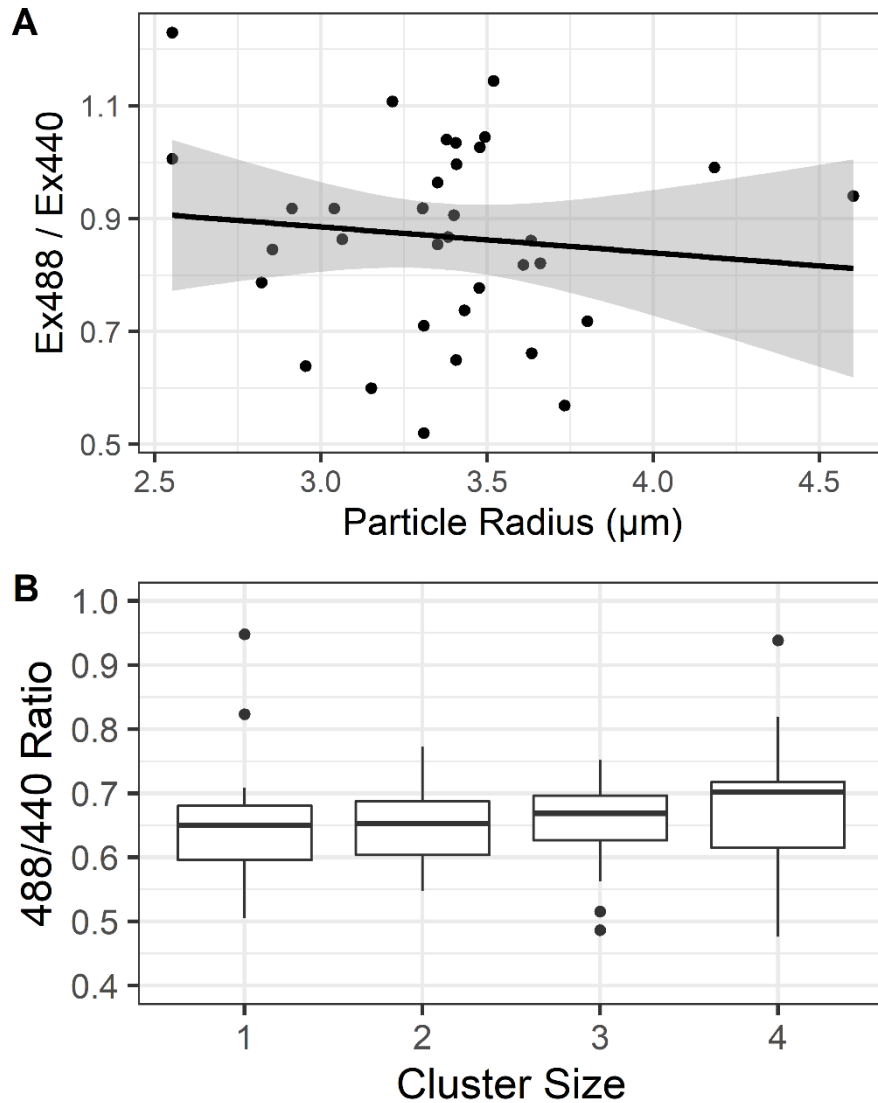

763

764 **Supplemental Figure 4.** Fluorescence ratio of ingested particles as a measurement of phagolysosomal  
765 pH compared to total volume of ingested particles. **A.** Fluorescence ratio of ingested *C. neoformans*. We  
766 found no significant correlation. **B.** Fluorescence ratio of ingested inert latex beads of 0.6  $\mu\text{m}$  diameter.  
767 Even with a cluster of four particles within a single phagosome we did not detect a threshold at which  
768 size alone disrupts the phagolysosomal pH.

769

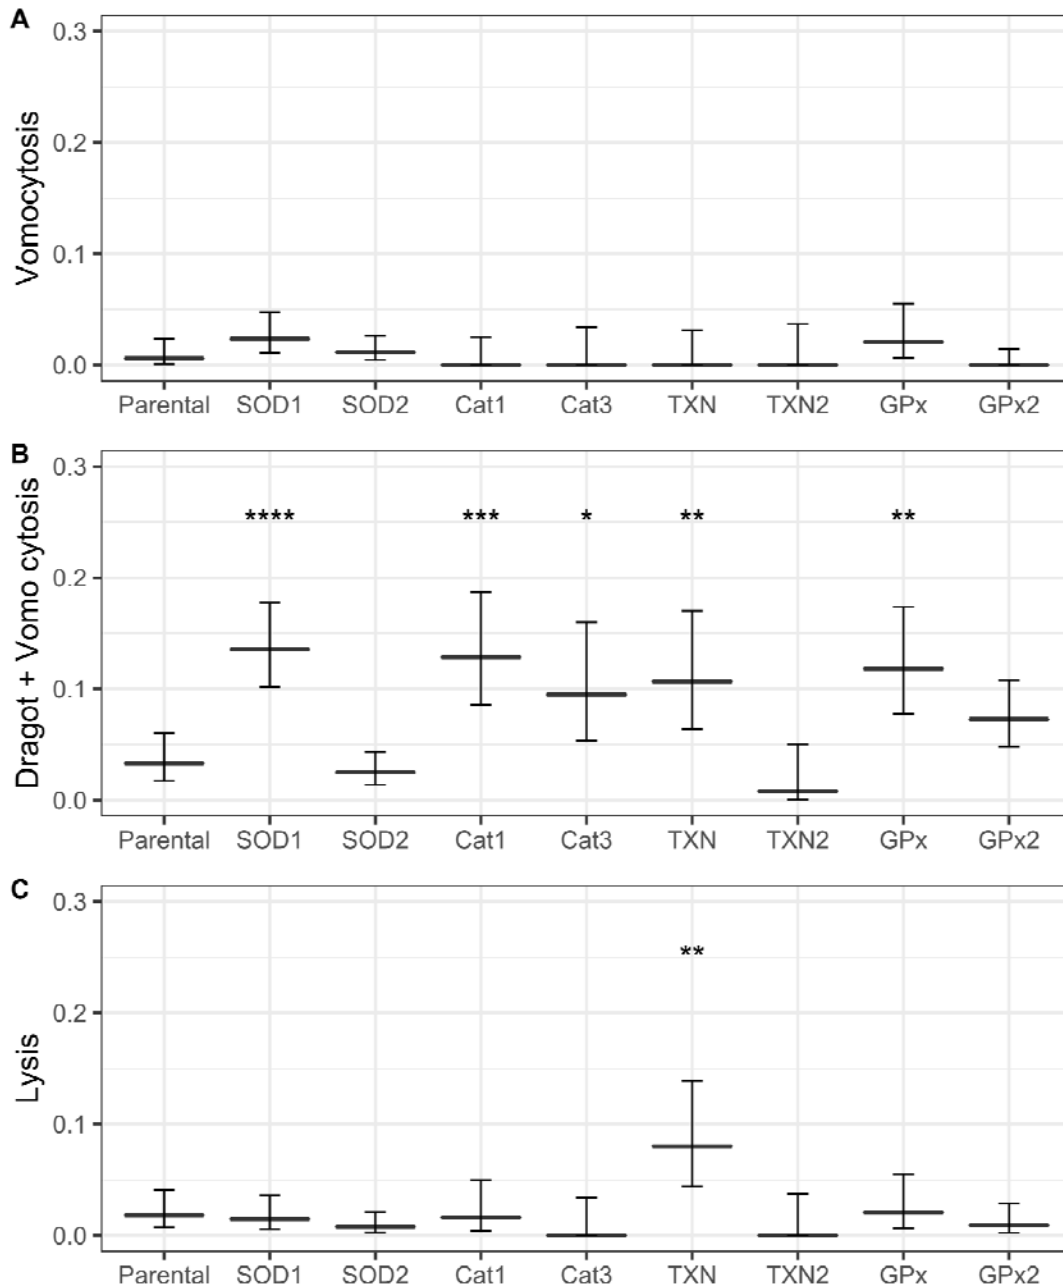

770

771 Supplemental Figure 5. Event frequencies of *C. neoformans* strain KN99 $\alpha$  and knockout mutants  
772 ingested by M1 BMDMs. **A.** Vomocytosis frequency among infected macrophages **B.** Combined  
773 Dragocytosis and Vomocytosis frequency among infected macrophages. **C.** Lysis frequency among  
774 infected macrophages. Graphs depict means with 95% confidence intervals. \*, \*\*, \*\*\*, \*\*\*\* signify  $P <$   
775 0.05, 0.01, 0.001, and 0.0001 via test of equal proportions, respectively. Bonferroni correction was  
776 applied for multiple hypotheses.
